# Supplementary material
Source: PubMed Central journal article supplement (PMC4197518)
Supplement: Position_Statement-Appendices.pdf [file Position_Statement-Appendices.pdf]

## **Appendix 1: Sample**

### **Sleep Logs**

- 1- *Parent-Report Sleep Log 1 (Attention, Behavior and Sleep Lab, Douglas Mental Health University Institute)*
- 2- *Child Self-Report Sleep Log 1(Attention, Behavior and Sleep Lab, Douglas Mental Health University Institute)*
- 3- *Self-Report Sleep Log 3 (Montreal Children's Hospital, McGill University Health Centre)*

From Gruber et al.

Gruber R, Weiss S, Frappier J, et al. Position statement on pediatric sleep. 2013.  
<http://www.canadiansleepsociety.ca/publisher/articleview/frnArticleID/396>.

**SLEEP AND ACTIVITY LOG**  
**Produced by: Dr. Gruber's Attention, Behavior, and Sleep Lab,**  
**Douglas Mental Health university Institute, Montreal (QC)**

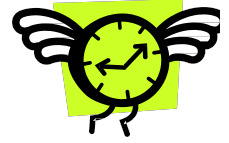

**This sleep log belongs to:** \_\_\_\_\_

Date: \_\_\_\_\_ Sunday / Monday / Tuesday / Wednesday / Thursday / Friday / Saturday

Today is: School day / P.E.D, day / Holiday      Filled by: Mother/ Father/ Other \_\_\_\_\_

**1) Medication**

- Today my child took medication? **Yes / No**
  - If yes, please indicate: What medication?  
\_\_\_\_\_
  - The dosage per day: \_\_\_\_\_
  - How many times did your child take it? \_\_\_\_\_ At what time? \_\_\_\_\_
- 

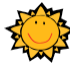

**2) Morning**

- My child woke today at: \_\_\_\_\_
- When waking up he/she was : **Alert / Sleepy**
- How difficult was it for your child to get out of bed? **Very difficult / Difficult / Easy**
- My child is feeling **Well / Sick**: (please describe) \_\_\_\_\_
- How long did my child sleep? \_\_\_\_\_ hours and \_\_\_\_\_ minutes.
- Did my child wake up during the night? **Yes / No**      How many times? \_\_\_\_\_
- 1<sup>st</sup> Wake up: Time: \_\_\_\_\_ Why? \_\_\_\_\_ For how long? \_\_\_\_\_
- 2<sup>nd</sup> Wake up: Time: \_\_\_\_\_ Why? \_\_\_\_\_ For how long? \_\_\_\_\_
- 3<sup>rd</sup> Wake up: Time: \_\_\_\_\_ Why? \_\_\_\_\_ For how long? \_\_\_\_\_
- 4<sup>th</sup> Wake up: Time: \_\_\_\_\_ Why? \_\_\_\_\_ For how long? \_\_\_\_\_
- 5<sup>th</sup> Wake up: Time: \_\_\_\_\_ Why? \_\_\_\_\_ For how long? \_\_\_\_\_
- Did my child brush his/her teeth this morning? **Yes / No**

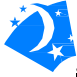

### **3) Evening**

- My child was in bed at: \_\_\_\_\_
- How long did it take my child to fall asleep? \_\_\_\_\_
- Any problems at bedtime? \_\_\_\_\_
- How did my child fall asleep? **By him/herself / With a toy / With a parent in the room / Other (please describe if other)** \_\_\_\_\_
- How was my child's behavior today?  
**As usual / Better than most days / Worse than most days**  
(please describe): \_\_\_\_\_
- How was my child's attention today?  
**As usual / Better than most days / Worse than most days**
- How was my child's mood today?  
**As usual / Better than most days / Worse than most days**
- Did my child make it to school on time today? **Yes / No**  
**(If no, please explain)** \_\_\_\_\_
- How much activity did my child do today (include in-school activities)? \_\_\_\_\_ **minutes**
- Did my child exercise within 1 hour of his/her bedtime? **Yes / No**
- Did my child eat healthily today? **Yes / No**  
**(Please describe)** \_\_\_\_\_
- Did my child have a large meal within 1 hour of his or her bedtime? **Yes / No**
- Did my child brush his or her teeth before going to bed? **Yes / No**

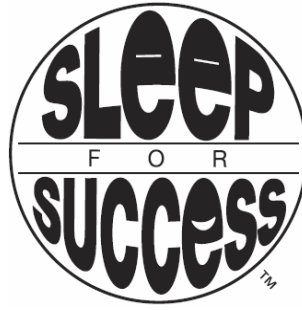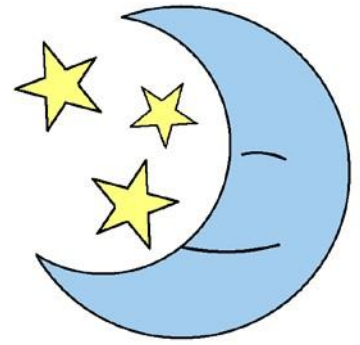

# My Sleep Log

Produced by:

Dr. Gruber's Attention, Behavior, and Sleep Lab,  
Douglas Mental Health university Institute, Montreal (QC)

Today is : \_\_\_\_\_

I woke up at: \_\_\_\_\_

I went to bed at: \_\_\_\_\_

I took medication: Yes / No

If yes, what kind? \_\_\_\_\_

---

Today is : \_\_\_\_\_

I woke up at: \_\_\_\_\_

I went to bed at: \_\_\_\_\_

I took medication: Yes / No

If yes, what kind? \_\_\_\_\_

---

Today is : \_\_\_\_\_

I woke up at: \_\_\_\_\_

I went to bed at: \_\_\_\_\_

I took medication: Yes / No

If yes, what kind? \_\_\_\_\_

---

Today is : \_\_\_\_\_

I woke up at: \_\_\_\_\_

I went to bed at: \_\_\_\_\_

I took medication: Yes / No

If yes, what kind? \_\_\_\_\_

---

Today is : \_\_\_\_\_

I woke up at: \_\_\_\_\_

I went to bed at: \_\_\_\_\_

I took medication: Yes / No

If yes, what kind? \_\_\_\_\_

---

Today is : \_\_\_\_\_

I woke up at: \_\_\_\_\_

I went to bed at: \_\_\_\_\_

I took medication: Yes / No

If yes, what kind? \_\_\_\_\_

---

Today is : \_\_\_\_\_

I woke up at: \_\_\_\_\_

I went to bed at: \_\_\_\_\_

I took medication: Yes / No

If yes, what kind? \_\_\_\_\_

---

Today is : \_\_\_\_\_

I woke up at: \_\_\_\_\_

I went to bed at: \_\_\_\_\_

I took medication: Yes / No

If yes, what kind? \_\_\_\_\_

---

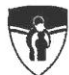

Centre universitaire de santé McGill  
McGill University Health Centre

- HME    HGM    HRV  
 MCH    MGH    RVH  
 HNM    ITM    CL  
 MNH    MCI    LC

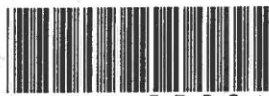

\* F M U - 5 3 9 9 \*

**JEREMY RILL SLEEP LABORATORY**

**SLEEP DIARY**

Numéro de dossier / Unit Number / Nom du patient / Patient's Name

| Date(yymmdd) | ☾<br>Midnight | ☾<br>2:00 | ☾<br>4:00 | ☀<br>6:00 | ☀<br>8:00 | ☀<br>10:00 | ☀<br>Noon | ☀<br>2:00 | ☀<br>4:00 | ☾<br>6:00 | ☾<br>8:00 | ☾<br>10:00 | COMMENTS |
|--------------|---------------|-----------|-----------|-----------|-----------|------------|-----------|-----------|-----------|-----------|-----------|------------|----------|
|              | Mon           |           |           |           |           |            |           |           |           |           |           |            |          |
|              | Tues          |           |           |           |           |            |           |           |           |           |           |            |          |
|              | Wed           |           |           |           |           |            |           |           |           |           |           |            |          |
|              | Thur          |           |           |           |           |            |           |           |           |           |           |            |          |
|              | Fri           |           |           |           |           |            |           |           |           |           |           |            |          |
|              | Sat           |           |           |           |           |            |           |           |           |           |           |            |          |
|              | Sun           |           |           |           |           |            |           |           |           |           |           |            |          |
|              | Mon           |           |           |           |           |            |           |           |           |           |           |            |          |
|              | Tues          |           |           |           |           |            |           |           |           |           |           |            |          |
|              | Wed           |           |           |           |           |            |           |           |           |           |           |            |          |
|              | Thur          |           |           |           |           |            |           |           |           |           |           |            |          |
|              | Fri           |           |           |           |           |            |           |           |           |           |           |            |          |
|              | Sat           |           |           |           |           |            |           |           |           |           |           |            |          |
|              | Sun           |           |           |           |           |            |           |           |           |           |           |            |          |

**Legend (see reverse for instructions)**

↓ -you get into bed   ↑-you get out of bed   shade in the boxes that correspond to your sleep times

C -caffeinated drinks   E -exercise for at least 20 mins   M -medications (please specify in COMMENTS column)

\* **COMMENTS** – please write why your sleep was disturbed and which medications you took. use another sheet if necessary, write the date beside each entry.

## Instructions

Please give your best guess in filling out this diary. Do not look at the clock in the middle of the night; just give your best guess the next morning. If you have any questions with this sleep diary, please call the Jeremy Rill Sleep Laboratory of the Montreal Children's Hospital (514) 412-4321.

### Legend (what to write)

Draw an ↓ when you get into bed. Draw an ↑ when you get out of bed. Shade in the boxes corresponding to the time that you are asleep. Write a **C** if you take caffeinated drinks. Write an **E** for exercise you do that lasts more than 20 minutes. Write an **M** for medications you take. Write the reasons why your sleep was disturbed and what medications you took in the **COMMENTS** column.

### Example:

**Bedtime: Nine thirty on Monday night.** Go to 9:30 p.m. on Monday night and draw a down-arrow ↓ to show you got into bed at this time.

**First fell asleep: Ten o'clock Monday night.** You think that you fell asleep at ten o'clock Monday night. Go to 10:00 o'clock Monday night and shade in from that point until you wake up.

**Awakening from sleep: Four o'clock for two hours.** You wake up during your sleep and are awake for two hours from 4:00 to 6:00 a.m.. There should be no shading between 4:00 and 6 a.m. Tuesday morning. No arrow would be placed if you stayed in bed during this wake period.

**Final awakening: Ten o'clock Tuesday morning.** You woke up for the day at ten o'clock on Tuesday morning. Based on the above there would be shading from 6:00 a.m. until 10:00 a.m.

**Out of bed: Ten thirty a.m. Tuesday.** Go to 10:30 a.m. on Tuesday morning and draw an up-arrow ↑ signifying you got out of bed at this point.

**Nap: Tuesday afternoon from one thirty to four o'clock.** Go to noon on Tuesday afternoon and draw a down arrow ↓ signifying when you got into bed. You think that you fell asleep at 2 o'clock so you shade in from 2:00 to 4:00. You draw an up-arrow ↑ to show when you got out of bed.

**Caffeinated drinks (C):** You drank one caffeinated drink at 3:00 o'clock on Monday afternoon. Go to 3:00 on Monday afternoon and write a **C**.

**Exercise (E):** You exercised for at least 20 minutes at 7:30 o'clock on Monday evening. Go to 7:30 on Monday evening and write an **E**.

**Medications (M):** You took your medications at 11:00 o'clock on Tuesday night. Go to 11:00 o'clock on Tuesday night and write an **M**.

**Comments:** Write the reasons your sleep was disturbed and what medications were taken.

| Date                  |      | ☾        | ☾    | ☾    | ☀    | ☀    | ☀     | ☀    | ☀    | ☀    | ☾    | ☾    | ☾     | COMMENTS                            |
|-----------------------|------|----------|------|------|------|------|-------|------|------|------|------|------|-------|-------------------------------------|
|                       |      | Midnight | 2:00 | 4:00 | 6:00 | 8:00 | 10:00 | Noon | 2:00 | 4:00 | 6:00 | 8:00 | 10:00 |                                     |
| (yyymmdd)<br>04-03-01 | Mon  |          |      |      |      |      |       |      | C    |      |      | E    | ↓     |                                     |
| 04-03-02              | Tues |          |      |      |      |      | ↑     | ↓    |      | ↑    |      |      | M     | 4:00 a.m. barking dog<br>M-ventolin |

## Appendix 2:

### Subjective Sleep Questionnaires:

#### 1- BEARS

Owens, J. A., & Dalzell, V. (2005). Use of the 'BEARS' sleep screening tool in pediatric residents' continuity clinic: a pilot study. *Sleep Medicine, 6*, 63-69.

#### 2- Modified Pediatric Epworth Sleepiness Scale

Melendres, C. S., Lutz, J. M., Ruban, E. D., & Marcus, C. L. (2004). Daytime sleepiness and hyperactivity in children with suspected sleep-disordered breathing. *Pediatrics, 114*, 768-775.

Johns, M. W. (1991). A new method for measuring daytime sleepiness: The Epworth Sleepiness Scale. *Sleep 14*, 540–545.

Johns, M. W. (1992). Reliability and factor analysis of the Epworth Sleepiness Scale. *Sleep, 15*, 376–381.

#### 3- Child Sleep Habits Questionnaire

Owens, J. A. Spirito, A., & McGuinn, M. (2000). The children's sleep habits questionnaire (CSHQ): Psychometric properties of a survey instrument for school-aged children, *Sleep, 23*(8), 1-9.



Special Section: Sleep Medicine Education based on NIH Sleep Academic Award Program  
Use of the ‘BEARS’ sleep screening tool in a pediatric residents’  
continuity clinic: a pilot study

Judith A. Owens<sup>a,\*</sup>, Victoria Dalzell<sup>b</sup>

<sup>a</sup>Division of Pediatric Ambulatory Medicine, Brown University School of Medicine, Rhode Island Hospital, 593 Eddy St.,  
Potter Building, Suite 200, Providence, RI 02903, USA

<sup>b</sup>Child Development Center, Brown University School of Medicine, Rhode Island Hospital, 593 Eddy St. Providence, RI 02903, USA

Received 30 March 2004; received in revised form 9 July 2004; accepted 14 July 2004

**Abstract**

**Objective:** To assess the effectiveness of a simple, 5-item pediatric sleep screening instrument, the BEARS (B=Bedtime Issues, E=Excessive Daytime Sleepiness, A=Night Awakenings, R=Regularity and Duration of Sleep, S=Snoring) in obtaining sleep-related information and identifying sleep problems in the primary care setting.

**Setting:** Pediatric residents’ continuity clinic in a tertiary care children’s hospital.

**Methods:** BEARS forms were placed in the medical records of a convenience sample of 2 to 12 year old children presenting for well child visits over the 5 month study period. Sleep-related information recorded in the BEARS visit and in the pre-BEARS visit, which was the subject’s most recent previous well child check (WCC), was coded with respect to whether or not a sleep problem was indicated, and whether sleep issues were addressed.

**Results:** A total of 195 children had both a documented pre-BEARS and BEARS WCC visit. BEARS visits were significantly more likely than the pre-BEARS visits to have any sleep information recorded (98.5% vs. 87.7%,  $p < 0.001$ ), and to have information recorded about bedtime issues (93.3% vs. 7.7%,  $p < 0.001$ ), excessive daytime sleepiness (93.9% vs. 5.6%,  $p < 0.001$ ), snoring (92.8% vs. 7.2%,  $p < 0.001$ ), nighttime awakenings (91.3% vs. 29.2%,  $p < 0.001$ ), and regularity and duration of sleep (65.3% vs. 31.5%,  $p < 0.001$ ). Significantly more sleep problems were identified during the BEARS visits in the domains of bedtime issues (16.3% vs. 4.1%,  $p < 0.001$ ), nighttime awakenings (18.4% vs. 6.8%,  $p < 0.001$ ) and snoring (10.7% vs. 4.6%,  $p = 0.012$ ). Finally, almost twice as many BEARS charts had sleep mentioned in the Impression and Plan (13.1% vs. 7.3%), which approached significance ( $p = 0.07$ ).

**Conclusions:** The BEARS appears to be a user-friendly pediatric sleep screening tool which significantly increases the amount of sleep information recorded as well as the likelihood of identifying sleep problems in the primary care setting.

© 2004 Elsevier B.V. All rights reserved.

*Keywords:* Sleep; Screening tools; Primary care

Sleep disturbances are among the most common issues raised by parents during health supervision, and it is estimated that upwards of 25% of children experience a significant sleep problem at some point during childhood [1]. Snoring, for example, the most common symptom of sleep-disordered breathing, has a high prevalence in childhood, affecting some 3–12% of preschool-aged children [2], and obstructive sleep apnea syndrome is conservatively estimated to affect 1–3% of the pediatric population [3].

Other studies have reported an overall prevalence of a variety of parent-reported sleep problems ranging from 37% in a community sample of 4–10-year-olds [4] to 25–50% in pre-school aged samples [5]. Although many sleep problems in infants and children are transient and self-limited in nature, certain intrinsic and extrinsic risk factors such as difficult temperament [6], chronic illness [7], and maternal depression [8] may predispose some children to develop more chronic sleep disturbances. Inadequate or poor sleep in children may have negative consequences on a host of functional domains, including mood [9], behavior [10,11], school performance [12,13], and health outcomes [14].

\* Corresponding author. Tel.: +401 444 8280; fax: +401 444 6218.  
E-mail address: owensleep@aol.com (J.A. Owens).

The impact of childhood sleep problems is further intensified by their direct effect on parents' sleep, resulting in parental daytime fatigue, mood disturbances, and a decreased level of effective parenting [15]. Furthermore, the financial burden of childhood sleep problems is considerable; it has been estimated that the economic cost of health professional contacts for infant crying and sleeping problems, for example, is the equivalent of 104 million US dollars per annum [16]. However, a number of empirically supported behavioral [17] and medical treatments for childhood sleep disorders exist and have been found to result in improved health-related and behavioral and academic outcomes [18,19].

It is clear from the above considerations, that pediatric sleep problems meet most if not all of the criteria for clinical conditions that warrant the implementation of screening procedures, including high prevalence, significant clinical impact, a natural history that may be affected by screening and intervention, and the availability of acceptable and effective treatments [20]. Therefore, it is especially important for pediatricians both to screen for and identify these treatable sleep disorders in children and adolescents during routine health encounters. The recent American Academy of Pediatrics clinical guidelines for the assessment and management of obstructive sleep apnea in children [21], for example, recommends that all children should be regularly screened for snoring in order to prevent and minimize the morbidity associated with sleep-disordered breathing. In addition, the screening process presents an opportunity during the well child visit to educate parents about normal sleep and the consequences of inadequate sleep in children, and to teach parents both primary and secondary prevention strategies. The recognition and evaluation of sleep problems in children by primary care providers requires not only familiarity with the developmentally appropriate differential diagnoses of common presenting sleep complaints (difficulty initiating and maintaining sleep, episodic nocturnal events, etc.), but also an understanding of the association between sleep disturbances and daytime consequences, such as irritability, inattention, and poor impulse control.

Despite the magnitude and clinical importance of sleep issues, several studies have documented that there is a low level of recognition of sleep disorders by primary care physicians in both adults [22–24] and children [25,26]. For example, in a recent survey of over 600 community-based pediatricians, over 20% of the respondents did not routinely screen for sleep problems in school-aged children in the context of the well-child visit, only about one quarter of routinely screened toddlers and preschoolers for snoring, and less than 40% questioned adolescents directly about their own sleep habits, despite the respondents' acknowledgement of the importance of sleep's impact on health, behavior, and school performance [25]. The supposition that parents would spontaneously volunteer the presence of any sleep problems and lack of time were cited as the primary

reasons for not screening by the sample. Another recent study [26] used a validated pediatric sleep questionnaire to identify a series of children with sleep-related symptoms at two community-based general pediatrics clinics and reviewed medical chart notes for the previous 2 years to determine how often sleep problems had been addressed. Fewer than 15% of patients had current chart notes that mentioned any of the questionnaire-defined sleep problems; diagnoses were mentioned for two of 86 patients and no treatments were discussed.

A number of studies have suggested that both education about screening [27] and the use of brief screening tools, including simple chart reminders, are cost-effective methods of increasing compliance with screening and preventive health care measures by health care providers [28,29]. Several studies have demonstrated that the use of simple screening tools, such as three question chart prompts and algorithms, was found to be associated with increased detection of obstructive sleep apnea in adults [24,30]. Because no similar pediatric sleep screening tools have been empirically tested, the purpose of the following study was to evaluate the effectiveness of a simple pediatric sleep screening instrument, the BEARS, in eliciting information and identifying sleep problems in a primary care setting. In order to be an effective screening tool, the instrument needed to be 'user-friendly', brief and easy to remember, acceptable to practitioners and parents, and had to screen for the most common pediatric sleep complaints across a range of ages in a diverse patient population. In this pilot study, we compared the amount and type of sleep information obtained and the likelihood of identifying sleep problems in a sample of pediatric primary care patients during the well child encounter, using both a standard, single, chart sleep prompt and the BEARS screening tool.

## 1. Methods

### 1.1. Subjects

This study was conducted in a pediatric residents' continuity clinic in a children's teaching hospital in Rhode Island, which serves a multi-ethnic, primarily low-income population. The clinic has approximately 21,000 primary care visits per year. Patients are primarily seen for clinic visits by pediatric residents, as well as by pediatric nurse practitioners on the clinic staff and occasionally by pediatric attending faculty. Because of resident turnover and scheduling considerations, patients may be seen by multiple different practitioners for well child care (WCC).

Study subjects were a convenience sample of patients between the ages of 2 and 12 years presenting for a routine WCC visit on designated study days over the 5-month study period between September and January. Subjects were included if there was a BEARS form (explained below) for that WCC visit ('BEARS visit') in the chart and if

the subject had had at least one previous WCC documented on the standard clinic form in the medical record ('pre-BEARS visit'). The subjects' most recent previous well child visits recorded on the standard clinic form was used as an historical control group.

### 1.2. Screening procedure

The standard WCC clinic form contained a series of brief one- or two-word prompts (such as 'School,' and 'Development') to direct residents in obtaining and recording medical information during the clinical interview. A single word prompt 'Sleep' was included as part of the standard clinic form. The standard form also included separate sections to record physical exam findings as well as an Impression and Plan section.

The BEARS is a screening tool developed by the investigators, which was designed to address the most common sleep issues in toddlers, preschoolers, and school-aged children. It incorporates five basic sleep domains: *Bedtime Problems*, including difficulty going to bed and falling asleep; *Excessive Daytime Sleepiness*, which includes behaviors typically associated with daytime somnolence in children; *Awakenings during the night*; *Regularity of sleep/wake cycles* (bedtime, wake time) and average sleep duration; and *Snoring*. These domains are felt to reflect the most common presenting sleep complaints in children. This screening tool prompts clinicians to ask parents an initial screening question about possible problems in each domain, eliciting a yes or no response. If the answer is 'yes' then the parents are asked to describe the problem. For example, if a parent responded 'yes' to snoring, the parents would be asked to describe how often the child snored and whether apnea accompanied the snoring.

During each clinic session in the 2 weeks preceding the study period, the investigators conducted brief (10 min) group orientation sessions with all the residents to explain the BEARS screen and inform them of placement of the BEARS forms in patient charts. No additional didactic information about sleep and/or sleep problems in children was included in these orientation sessions. Half-page forms with the BEARS screen were placed in the medical records of WCC visits in the appropriate age range by the certified nursing assistants at the time of the visit. Charts were collected after each visit of each clinic day. The medical record for the BEARS visit and the pre-BEARS visit were copied. The BEARS was initially test piloted by the investigators in several pediatric primary care settings to assess its adaptability to different age groups. The project was reviewed and approved by the hospital institutional review board.

### 1.3. Data collection

Charts were then reviewed and demographic information recorded. The professional status of the practitioner who

saw the patient at each visit (nurse practitioner, attending, resident) and, when applicable, the resident's training level was also recorded. The medical records for each BEARS and pre-BEARS WCC visit for each patient were then independently coded by two reviewers for the following information: (1) whether or not any sleep information was recorded for the visit in the five BEARS domains, and (2) whether the sleep information recorded for the visit indicated a definite sleep problem, a probable sleep problem, no problem, or insufficient information to make a determination. In order to assess whether the use of the BEARS screen was more likely to result in documentation of other sleep issues as well, additional sleep-related variables not included in the five BEARS domains, such as parasomnias, napping, co-sleeping, and presence of a TV in the bedroom, were also coded for each visit. In addition, the Impression and Plan section of the medical record for each visit was coded for (1) whether or not a sleep problem was mentioned and, if so, in what domain(s) and (2) whether a sleep-related diagnostic test (e.g., lateral neck radiograph, overnight sleep study) was ordered. In the event of a coding discrepancy between reviewers, each chart was re-reviewed and a consensus was reached. Visits were included even if the resident chose not to fill out the BEARS form.

### 1.4. Analyses

Data were entered into the SPSS version 9.0. Descriptive statistics were used to describe the sample as a whole including frequency counts and means. A McNemar test was used to compare the pre-BEARS and BEARS visits with respect to the following categorical variables: presence or absence of any sleep information, presence or absence of sleep information in each of the five BEARS domains, presence or absence of a definite or probable sleep problem (two problem categories combined) in each domain, and presence or absence of a sleep problem mentioned in the Impression and Plan section of the WCC. The total number of other sleep issues documented in the medical record for both the BEARS and pre-BEARS visits were also compared using a paired sample *t*-test.

Pearson correlations were used to examine the association between frequency of sleep problems and the age of the patient at the time of the WCC visit.

## 2. Results

A total of 195 children had both a documented pre-BEARS and BEARS WCC visit. As expected, the average age at the BEARS visit was significantly older at 5.60 SD 2.85 years than the average age at the pre-BEARS visit of 4.35 SD 2.77 years ( $t = -20.586$ ,  $P < 0.001$ ). Half (52%) of the sample was male, 44% was Hispanic, 27% was African-American, 16% Caucasian, 1% Asian, and 12% other.

Table 1  
Comparison of percentage of medical records with sleep information recorded between Pre-BEARS and BEARS WCC Visits

|                          | Pre-BEARS (%) | BEARS (%) | P value |
|--------------------------|---------------|-----------|---------|
| General sleep            | 87.7          | 98.5      | <0.001  |
| Bedtime issues           | 7.7           | 93.3      | <0.001  |
| Excessive day sleepiness | 5.6           | 93.9      | <0.001  |
| Awakenings at night      | 29.2          | 91.3      | <0.001  |
| Regularity/duration      | 31.5          | 65.3      | <0.001  |
| Snoring                  | 7.2           | 92.8      | <0.001  |
| Parasomnias              | 3.1           | 7.7       | 0.035   |

Eighty percent was at poverty or low-income level, based on Rhode Island zip code information.

Table 1 compares pre-BEARS and BEARS visits with respect to whether any information was recorded about sleep in general, and whether there was any information recorded in each of the sleep domains. Significantly more BEARS visits had *any* sleep information in general recorded; BEARS WCC visits were over 10 times more likely than the pre-BEARS visits to have information recorded about bedtime issues and excessive daytime sleepiness, three times more likely to have had information recorded about nighttime awakenings, and twice as likely to have had information recorded about regularity and duration of sleep. Finally, over 10 times as many BEARS charts had information recorded about snoring.

In terms of other sleep-related information recorded, although parasomnias were not directly addressed in the BEARS screen, they were still twice as likely to be mentioned in the BEARS visits charts. Using a paired *t*-test comparison, the difference between the total number of sleep-related (non BEARS domains) variables recorded in the BEARS WCC visits (mean =  $0.99 \pm 0.95$ ) compared to the pre-BEARS visits (mean =  $0.59 \pm 0.88$ ) was highly significant ( $t = 4.791$ ,  $P < 0.001$ ).

Table 2 compares the presence of a probable or definite problem in each of the BEARS sleep domains and parasomnias between the pre-BEARS and BEARS WCC visits. Significantly more probable or definite problems were identified during the BEARS visits compared to the pre-BEARS visits in the domains of bedtime issues (four-fold), nighttime awakenings (almost three-fold), and snoring (more than twice the number). The BEARS visits were

Table 2  
Comparison of percentage of medical records with identified sleep problems (definite or probable) between Pre-BEARS and BEARS WCC visits

|                          | Pre-BEARS (%) | BEARS (%) | P value |
|--------------------------|---------------|-----------|---------|
| Bedtime issues           | 4.1           | 16.3      | <0.001  |
| Excessive day sleepiness | 4.1           | 5.6       | 0.629   |
| Awakenings at night      | 6.8           | 18.4      | <0.001  |
| Regularity/duration      | 3.6           | 5.7       | 0.454   |
| Snoring                  | 4.6           | 10.7      | 0.012   |
| Parasomnias              | 2.0           | 4.1       | 0.219   |
| Sleep in impression/plan | 7.3           | 13.1      | 0.071   |

not significantly more likely to identify a problem with excessive daytime sleepiness. A regular bedtime of later than 10 p.m. was recorded and used to define a probable or definite problem with sleep regularity and duration. Although the BEARS visits were more likely to identify a problem in this domain, this was not statistically significant ( $P = 0.454$ ). Twice as many parasomnias were reported during the BEARS visits but this difference was also not significant ( $P = 0.219$ ).

Table 2 also compares the percentage of pre-BEARS and BEARS visits that mention sleep-related issues in the Impression and Plan section of the medical record. Almost twice as many of all BEARS charts had sleep mentioned in the Impression and Plan (13.1 vs. 7.3%); this difference approached significance ( $P = 0.071$ ). There was no difference in the likelihood of ordering a sleep diagnostic test (e.g. overnight sleep study, lateral neck film) between groups, but very few sleep-related diagnostic studies were ordered by either group. Behavioral interventions mentioned in the Plan section were largely general recommendations regarding behavior (setting limits, providing positive reinforcement), but also included some specific sleep strategies such as limiting television viewing, setting a bedtime routine, shifting the sleep-wake schedule, and limiting naps. One patient was referred to otolaryngology, but no patients were referred to a sleep clinic.

In order to assess the impact of potential confounding factors, the following additional analyses were conducted. Given that the BEARS sample was conducted when the group was older, it was possible that increasing age accounted for the increased likelihood of identifying a sleep problem. However, the number of sleep problems identified did not significantly correlate with age at either of the visits ( $R = 0.011$ ,  $P = -0.953$ , pre-BEARS and  $R = -0.072$ ,  $P = 0.953$  BEARS). In order to assess the possible impact of resident training level (more experienced residents more likely to identify a sleep problem), training levels for resident-conducted visits were dichotomized into post-graduate level one (PL-1) or post-graduate level two or greater and compared using the McNemar test. The percentage of less experienced PL-1 residents conducting BEARS (34%) and pre-BEARS visits (31%) was not significantly different ( $P = 0.724$ ). Finally, it was possible that the BEARS visits were more likely to have more medical information in general recorded that was not just limited to sleep-related information than the pre-BEARS visits. In order to further examine this possibility, we compared information recorded about another behavioral/developmental domain, school problems, between pre-BEARS and BEARS visits. As mentioned above, 'School' was another one of the single word prompts in the standard well child form. School problems were not significantly more likely to be documented during the BEARS vs. the pre-BEARS visits ( $P = 0.115$ ).

### 3. Discussion

The results of this study suggest that the use of a simple 5-question screening tool for pediatric sleep problems is significantly more likely than the use of a standard single chart prompt to yield sleep information in general, as well to yield information about specific sleep domains. There was a 2–ten-fold difference in the amount of information recorded during the BEARS visits in each of the five sleep domains and parasomnias. In addition, the information obtained with the BEARS screen was significantly more likely to result in sleep problems being identified in the chart for bedtime issues, night wakings, and snoring. Increases in the percentage of problems in the individual sleep domains identified at the BEARS visits ranged from more than two-fold for snoring and almost three-fold for night wakings, to four-fold for bedtime issues. The finding that the BEARS was more effective in eliciting information is even more significant when consideration is given to the fact that, in most clinical settings, well child encounter forms do not include any sleep prompts at all and there was such a prompt included in the pre-BEARS visits. The BEARS is therefore likely to have even more impact when compared to usual clinical practice.

Furthermore, the percentage of patients identified as having sleep problems in the various domains during the BEARS visits was similar in many cases to the prevalence of those same problems cited in the literature. For example, a number of studies have suggested that the prevalence of bedtime resistance in early school-aged children, the same age group as the sample population, is in the range of 15% [4] to 27% [31], which is much higher than the 4% identified in the control visits and closer to the 16% prevalence identified at the BEARS visits. Similarly, the percentage of children identified by the BEARS as having significant snoring (11%) was very similar to the prevalence of frequent snoring for that age group reported in previous studies [2, 32]. This further supports the suggestion that the use of a standard single sleep question may fail to elicit adequate clinical information to determine the presence of a potentially serious sleep problem, particularly in the realm of sleep-disordered breathing.

The use of the BEARS screen was also more likely to result in documentation of additional sleep-related information, including sleeping arrangements, presence of a television in the child's bedroom, naps, and co-sleeping. Such information may not only be useful in elucidating the context of and factors contributing to existing sleep problems, but may be important in identifying potential intervention points to prevent future sleep problems from developing. For example, the use of prevention strategies, such as suggesting that parents begin to put infants to bed 'drowsy but awake' at around 4 months of age in order to avoid dependence on parental presence at sleep onset and to foster the infants' ability to 'self-soothe', have been shown to be highly effective in reducing the likelihood of

prolonged night wakings [33]. An increased focus during the well child encounter on sleep issues allows for the opportunity to provide additional anticipatory guidance, such as educating parents of newborns about normal sleep amounts and patterns, discussing the importance of regular bedtimes, bedtime routines, and transitional objects for toddlers, and providing parents and children with basic information about good 'sleep hygiene' and adequate sleep amounts.

Although sleep problems were more likely to be identified in the BEARS visits, this did not appear to have as significant an effect on the likelihood of having a specified diagnostic and/or treatment plan documented in the medical record. Previous chart review studies of sleep histories in adults have reported similar findings [30] regarding of lack of impact on patient management. One possible explanation for this finding is that residents may not feel comfortable and/or knowledgeable enough about sleep problems in their patients to appropriately address them. A recent survey study of community-based practicing pediatricians reported that less than a third of the respondents rated themselves as very confident or confident of their own ability to evaluate sleep problems in children and only one quarter rated themselves as very confident or confident in treating pediatric sleep disorders [25]. The relative lack of attention paid to sleep disorders in post-graduate pediatric education programs [34] may be in part responsible for this clinical knowledge gap.

There were a number of limitations in this pilot study, which should be addressed. First, because of the study design, we were unable to separate out the effectiveness of the BEARS instrument as a screening tool independent of several related factors, including the impact of incorporating the BEARS as a chart reminder into the medical record and the role played by instruction provided to residents on use of BEARS. Although residents were not explicitly informed of the purpose of the study, they may have been somewhat more likely to record information during the BEARS visits because of the attention focused on sleep issues by the orientation sessions. However, these sessions were felt to be necessary in order to provide uniform clarification on the use of the BEARS and specifically did not include any educational component regarding sleep issues in children. Due to logistical constraints in the clinic setting, we were unable to monitor on a daily basis if blank or incomplete BEARS forms were removed from the charts by residents; however, of the BEARS forms collected, only 5% had not been filled out, suggesting a high rate of compliance. Because of concern regarding possible contamination of information about the BEARS across residents, particularly given the fact that residents frequently saw their patients on continuity clinic days other than the one to which they were regularly assigned, we elected to use a design that incorporated historical rather than concurrent controls. We were also unable to follow the residents longitudinally after the study period was

concluded so that we could assess their continued use of the BEARS screen during subsequent well child encounters and thus cannot comment on the longer-term sustainability of the behavioral change. This would clearly be a key issue to study in the future. Finally, as with all chart review studies, the written documentation of the clinical encounter may not have been a complete record of the information actually obtained by the resident during the clinical interview, although this factor was unlikely to be substantially different across the two conditions.

The differences found in information and prevalence and types of sleep problems recorded between the BEARS and control visits may in part have been related to variables other than the sleep screening method employed, including provider- and patient-related factors [35]. For example, because of the study design, the patients were older at the time of the BEARS visit than at the control well child visit, and the increase in sleep problem prevalence may have been a factor of increasing age. However, studies have suggested that sleep problems in general are more prevalent in younger children than in school-aged children [36], and that parents are also more likely to both be aware of and to report sleep problems in younger children as well [4]. Furthermore, we did not find a significant correlation in our sample population between sleep problems and age. It is also possible that the BEARS visits were more likely to be conducted by upper level and thus more experienced residents who were more likely to note and record sleep problems in their patients. However, there was not a significant difference between the BEARS and control visits in the percentage of patients seen by a first-year compared to an upper-level resident.

In conclusion, this study suggests that the use of a simple brief screening tool for pediatric sleep problems is a cost-effective tool for identifying parents' concerns about their children's sleep, particularly in domains such as snoring that may not have been otherwise assessed. Future studies should evaluate the effectiveness of the BEARS screen with both experienced practitioners, such as community-based pediatricians, and with other types of health care professionals, such as family medicine practitioners, nurse practitioners, and mental health providers, in order to assess the generalizability of our results. The BEARS should also be compared to accepted 'gold standards' for the diagnosis of pediatric sleep disorders (International Classification of Sleep Disorders criteria, polysomnography, other pediatric sleep screening tools [37], etc.) in order to assess the validity as well as sensitivity and specificity of the instrument. Finally, combining the use of the BEARS with sleep curriculum materials and ongoing educational efforts may be necessary in order to more definitively impact physician behavior, including optimal management of sleep problems in the primary care setting, and is worthy of further study.

## Acknowledgements

This project was supported by the Sleep Academic Award grant program of the National Heart, Lung, and Blood Institute of the National Institute of Health.

## Appendix A

The 'BEARS' is designed to provide a practical and user-friendly vehicle for teaching medical students and residents to incorporate a pediatric sleep history into the standard history and physical in both ambulatory and inpatient settings. The 'BEARS' instrument is divided into five major sleep domains, which provides a comprehensive screen for the major sleep disorders affecting children in the 2–18-year old age range. Each sleep domain has a set of age-appropriate 'trigger questions' for use in the clinical interview.

Examples of developmentally appropriate trigger questions:

|                                  | Preschool<br>(2–5 years)                                                    | School-aged<br>(6–12 years)                                                                                                  | Adolescent<br>(13–18 years)                                                                                  |
|----------------------------------|-----------------------------------------------------------------------------|------------------------------------------------------------------------------------------------------------------------------|--------------------------------------------------------------------------------------------------------------|
| Bedtime problems                 | Does your child have any problems going to bed?<br>Falling asleep?          | Does your child have any problems at bedtime? (P)<br>Do you have any problems going to bed? (C)                              | Do you have any problems falling asleep at bedtime? (C)                                                      |
| Excessive day-time sleepiness    | Does your child seem over tired or sleepy a lot during the day?             | Does your child have difficulty waking in the morning, seem sleepy during the day or take naps? (P)                          | Do you feel sleepy a lot during the day? in school? while driving? (C)                                       |
| Awakenings during the night      | Does she still take naps?<br>Does your child wake up a lot at night?        | Do you feel tired a lot? (C)<br>Does your child seem to wake up a lot at night? Any sleepwalking or nightmares? (P)          | Do you wake up a lot at night?<br>Have trouble getting back to sleep? (C)                                    |
| Regularity and duration of sleep | Does your child have a regular bedtime and wake time?<br><br>What are they? | What time does your child go to bed and get up on school days? weekends?<br>Do you think he/she is getting enough sleep? (P) | What time do you usually go to bed on school nights?<br><br>Weekends? How much sleep do you usually get? (C) |

(continued on next page)

|                            | Preschool<br>(2–5 years)                                           | School-aged<br>(6–12 years)                                                              | Adolescent<br>(13–18 years)                     |
|----------------------------|--------------------------------------------------------------------|------------------------------------------------------------------------------------------|-------------------------------------------------|
| Sleep-disordered breathing | Does your child snore a lot or have difficulty breathing at night? | Does your child have loud or nightly snoring or any breathing difficulties at night? (P) | Does your teenager snore loudly or nightly? (P) |

B, bedtime problems; E, excessive daytime sleepiness; A, awakenings during the night; R, regularity and duration of sleep; S, sleep-disordered breathing; P, Parent C, Child.

**References**

[1] Mindell JA, Owens JA, Carskadon MA. Development features of sleep. *Child Adolesc Psychiatr Clin NA* 1999;8(4):695–725.

[2] Ali NJ, Pitson DJ, Stradling JR. Snoring, sleep disturbance, and behaviour in 4–5 year olds. *Arch Dis Child* 1993;68:360–6.

[3] Redline S, Tishler PV, Schluchter M, et al. Risk factors for sleep-disordered breathing in children. Associations with obesity, race, and respiratory problems. *Am J Respir Crit Care Med* 1999;159:1527–32.

[4] Owens JA, Spirito A, McGuinn M, Nobile C. Sleep habits and sleep disturbance in elementary school-aged children. *Dev Behav Pediatr* 2000;21(1):27–36.

[5] Lavigne JV, Koplewicz HS, Abikoff H, Foley C. Sleep and behavior problems among pre-schoolers. *J Dev Behav Pediatr* 1999;20:164–70.

[6] Owens-Stively J, Frank N, Smith A, et al. Child temperament, parenting discipline style, and daytime behavior in childhood sleep disorders. *Dev Behav Pediatr* 1997;18(5):314–21.

[7] Bloom BJ, Owens JA, McGuinn M, et al. Sleep and its relationship to pain, dysfunction, and disease activity in juvenile rheumatoid arthritis. *J Rheumatol* 2002;29:169–73.

[8] Zuckerman B, Stevenson J, Bailey V. Sleep problems in early childhood: continuities, predictive factors, and behavioral correlates. *Pediatrics* 1987;80:664–71.

[9] Carskadon MA. Patterns of sleep and sleepiness in adolescents. *Pediatrician* 1990;17:5–12.

[10] Ali NJ, Pitson D, Stradlin JR. Natural history of snoring and related behaviour problems between the ages of 4 and 7 years. *Arch Dis Child* 1994;71:74–6.

[11] Minde K, Faucon A, Falkner S. Sleep problems in toddlers: effects of treatment on their daytime behavior. *J Am Acad Child Adolesc Psychiatry* 1994;33:1114–21.

[12] Wolfson AR, Carskadon MA. Sleep schedules and daytime function in adolescents. *Child Dev* 1998;69:875–87.

[13] Kahn A, Van de Merckt C, Rebuffat E, et al. Sleep problems in healthy preadolescents. *Pediatrics* 1989;84:542–6.

[14] Valent F, Brusaferrero S, Barbone F. A case-crossover study of sleep and childhood injury. *Pediatrics* 2001;107:E23.

[15] Gelman VS, King NJ. Wellbeing of mothers with children exhibiting sleep disturbance. *Austrian J Psychol* 2001;53(1):18–22.

[16] Morris S, St James-Roberts I, Sleep J, Gillham P. Economic evaluation of strategies for managing crying and sleeping problems. *Arch Dis Child* 2001;84(1):15–19.

[17] Mindell JA. Empirically supported treatments in pediatric psychology: bedtime refusal and night wakings in young children. *J Pediatr Psychol* 1999;24(6):465–81.

[18] Ali NJ, Pitson D, Stradling JF. Sleep disordered breathing: effects of adenotonsillectomy on behaviour and psychological functioning. *Eur J Pediatr* 1996;155:56–62.

[19] Walters AS, Mandelbaum DE, Lewin DS, et al. Dopaminergic therapy in children with restless legs/periodic limb movements in sleep and ADHD. Dopaminergic Therapy Study Group. *Pediatr Neurol* 2000;22:182–6.

[20] Whitby LG. Screening for disease: definitions and criteria. *Lancet* 1974;5:819–21.

[21] American Academy of Pediatrics. Clinical practice guideline: diagnosis and management of childhood obstructive sleep apnea syndrome. *Pediatrics* 2002;109(4):704–12.

[22] Report of the National Commission on Sleep Disorders Research. vol 1, Executive summary and executive report. Bethesda, MD; National Institutes of Health; 1992.

[23] Meissner HH, Riemer A, Santiago SM, et al. Failure of physician documentation of sleep complaints in hospitalized patients. *West J Med* 1998;169:146–9.

[24] Haponik EF, Frye AW, Richards B, et al. Sleep history is neglected diagnostic information—challenges for primary care physicians. *J Gen Intern Med* 1996;11:759–61.

[25] Owens JA. The practice of pediatric sleep medicine: results of a community survey. *Pediatrics* 2001;108(3):e51.

[26] Chervin RD, Archbold KH, Panahi P, Pituch KJ. Sleep problems seldom addressed at two general pediatric clinics. *Pediatrics* 2001;107(6):1375–80.

[27] Davis DA, Thomson MA, Oxman AD, Haynes RB. Changing physician performance: a systematic review of the effect of continuing medical education strategies. *J Am Med Assoc* 1995;274(9):700–5.

[28] Cheney C, Ramsdell JW. Effect of medical records’ checklists on implementation of periodic health measures. *Am J Med* 1987;83:129–36.

[29] Chang HC, Zimmerman LH, Beck JM. Impact of chart reminders on smoking cessation practices of pulmonary physicians. *Am J Respir Crit Care Med* 1995;152:984–7.

[30] Namen AM, Wymer A, Case D, Haponik EF. Performance of sleep histories in an ambulatory medicine clinic. *Chest* 1999;116:1558–63.

[31] Blader JC, Koplewicz HS, Abikoff H, Foley C. Sleep problems of elementary school children: a community survey. *Arch Pediatr Adolesc Med* 1997;151:473–80.

[32] Gialason T, Benediktsdottir B. Snoring, apneic episodes, and nocturnal hypoxemia among children 6 months to 6 years old. *Chest* 1995;107:963–6.

[33] Goodlin-Jones BL, Burnham MM, Gaylor EE, Anders TF. Night waking, sleep-wake organization, and self-soothing in the first year of life. *Dev Behav Pediatr* 2001;22(4):226.

[34] Mindell JA, Moline ML, Zendell SM, et al. Pediatricians and sleep disorders: training and practice. *Pediatrics* 1994;94:194–200.

[35] Stancin T, Palermo TM. A review of behavioral screening practices in pediatric settings: do they pass the test? *J Dev Behav Pediatr* 1997;18:183–94.

[36] Kerr S, Jowett S. Sleep problems in pre-school children: a review of the literature. *Child Care Health Dev* 1994;20:379–91.

[37] Chervin RD, Hedger KM, Dillon JE, Pituch KJ. Pediatric Sleep Questionnaire (PSQ): validity and reliability of scales for sleep-disordered breathing, snoring, sleepiness, and behavioral problems. *Sleep Med* 2000;1:21–32.

# PEDIATRICS®

OFFICIAL JOURNAL OF THE AMERICAN ACADEMY OF PEDIATRICS

## **Daytime Sleepiness and Hyperactivity in Children With Suspected Sleep-Disordered Breathing**

Cecilia S. Melendres, Janita M. Lutz, Eric D. Rubin and Carole L. Marcus

*Pediatrics* 2004;114;768

DOI: 10.1542/peds.2004-0730

The online version of this article, along with updated information and services, is located on the World Wide Web at:

<http://pediatrics.aappublications.org/content/114/3/768.full.html>

PEDIATRICS is the official journal of the American Academy of Pediatrics. A monthly publication, it has been published continuously since 1948. PEDIATRICS is owned, published, and trademarked by the American Academy of Pediatrics, 141 Northwest Point Boulevard, Elk Grove Village, Illinois, 60007. Copyright © 2004 by the American Academy of Pediatrics. All rights reserved. Print ISSN: 0031-4005. Online ISSN: 1098-4275.

American Academy of Pediatrics

DEDICATED TO THE HEALTH OF ALL CHILDREN™

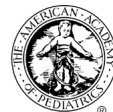



# Daytime Sleepiness and Hyperactivity in Children With Suspected Sleep-Disordered Breathing

Ma. Cecilia S. Melendres, MD\*; Janita M. Lutz, RPsgT\*; Eric D. Rubin, MD‡; and Carole L. Marcus, MBBCh\*

**ABSTRACT.** *Objectives.* Excessive daytime sleepiness (EDS) is seen less frequently as a presenting complaint in children with sleep-disordered breathing than in adults. Instead, symptoms of hyperactivity are often described. We hypothesized that children with suspected sleep-disordered breathing (S-SDB) were both sleepier and more hyperactive than control subjects. Furthermore, we hypothesized that overnight polysomnographic parameters correlated with sleepiness and hyperactivity.

*Methods.* A cross-sectional study was conducted at a university-affiliated hospital and a community-based pediatric clinic. A total of 108 patients with S-SDB (mean [standard deviation] age:  $7 \pm 4$  years) and 72 control subjects ( $8 \pm 4$  years) were recruited. A modified Epworth Sleepiness Scale (ESS) and the Conners Abbreviated Symptom Questionnaire were administered. Polysomnography was performed in patients with S-SDB.

*Results.* Patients with S-SDB had a higher ESS ( $8.1 \pm 4.9$  vs  $5.3 \pm 3.9$ ) and a higher Conners score ( $12.8 \pm 7.6$  vs  $9.0 \pm 6.2$ ) than control subjects. On the basis of adult criteria, 28% of patients had EDS. There was no difference in the ESS and Conners scores of patients with primary snoring and patients with obstructive sleep apnea. The ESS had weak correlations with polysomnographic parameters.

*Conclusions.* Although the ESS score of children with S-SDB was within the normal range for adults, these children were sleepier and more hyperactive than control subjects. However, these data should be confirmed by a population-based study. *Pediatrics* 2004;114:768–775; *obstructive sleep apnea, Epworth score, polysomnography.*

---

ABBREVIATIONS. OSAS, obstructive sleep apnea syndrome; EDS, excessive daytime sleepiness; SDB, sleep-disordered breathing; S-SDB, suspected sleep-disordered breathing; PSG, polysomnography; ESS, Epworth Sleepiness Scale;  $Sa_{O_2}$ , arterial oxygen saturation;  $ET_{CO_2}$ , end-tidal carbon dioxide tension; PS, primary snoring; PLM, periodic limb movement; REM, rapid eye movement; UARS, upper airway resistance syndrome; EEG, electroencephalogram.

---

From the \*Eudowood Division of Pediatric Respiratory Sciences, Johns Hopkins University School of Medicine, Baltimore, Maryland; and ‡East Baltimore Medical Center, Baltimore, Maryland.

Accepted for publication Apr 9, 2004.

DOI: 10.1542/peds.2004-0730

Reprint requests to (C.L.M.) Children's Hospital of Philadelphia, Pulmonary Division, 5th Floor Wood, 34th St and Civic Center Blvd, Philadelphia, PA 19104. E-mail: marcus@email.chop.edu

PEDIATRICS (ISSN 0031 4005). Copyright © 2004 by the American Academy of Pediatrics.

The childhood obstructive sleep apnea syndrome (OSAS) is a disorder of breathing during sleep characterized by prolonged partial upper airway obstruction and/or intermittent complete obstruction that disrupts normal ventilation during sleep and normal sleep patterns.<sup>1</sup> It has an estimated prevalence of 1% to 2% among young children<sup>2,3</sup> and can lead to serious morbidity and even mortality if left untreated.<sup>4–7</sup>

In contrast to adults, excessive daytime sleepiness (EDS) is seen less frequently as a presenting complaint in children with sleep-disordered breathing (SDB).<sup>4,8–10</sup> Symptoms of inattention and hyperactivity are often described.<sup>8</sup> The prevalence of EDS in children with SDB has been shown to vary over a wide range, from as low as 8% to as high as 84%.<sup>7,9–12</sup> The significantly differing values may be attributable in part to a lack of standard assessment techniques for sleepiness in children. Previous studies have used different subjective criteria such as the use of parental report. Only 1 previous study used objective criteria to evaluate sleepiness in children with SDB.<sup>13</sup> The present study aimed to use a simple and inexpensive instrument, which has been validated in adults,<sup>14,15</sup> to evaluate EDS in children with suspected SDB (S-SDB).

We hypothesized that children with S-SDB were both sleepier and more hyperactive than control subjects. Furthermore, we hypothesized that parameters on overnight polysomnography (PSG) correlated with EDS and hyperactivity in these children.

## METHODS

The study protocol was approved by the Institutional Review Board of Johns Hopkins University. Informed consent was secured from the subjects' parents or legal guardians. Assent was obtained from all subjects  $\geq 5$  years of age. Patients with S-SDB and control subjects were studied. Control subjects were screened using Brouillette's scoring system.<sup>16</sup> A modified Epworth Sleepiness Scale (ESS)<sup>14</sup> and the Conners Abbreviated Symptom Questionnaire<sup>17</sup> for hyperactivity were administered to all subjects. Patients with S-SDB then underwent overnight PSG.

## Study Population

S-SDB patients were recruited sequentially and prospectively from all new patients who were referred to the Pediatric Sleep Disorders Clinic at Johns Hopkins Hospital for evaluation of clinically S-SDB secondary to adenotonsillar hypertrophy. Children were included when they were aged 2 to 18 years. They were excluded when they had other medical or neurologic conditions, had craniofacial abnormalities, had undergone adenotonsillectomy or other upper airway surgery, or were on medications that could affect their level of alertness. All patients were seen by a pediatric sleep specialist, and those with possible sleep disorders

other than OSAS were excluded. Control subjects were recruited from a general pediatric clinic in a primary care setting and from the Dermatology Clinic at Johns Hopkins Hospital.

### Screening of Control Subjects

Control subjects were screened for OSAS using Brouillette's scoring system. Brouillette et al<sup>16</sup> formulated a scoring system to determine the likelihood of OSAS on the basis of history alone. Three variables were included in this score: difficulty breathing during sleep, observed apnea, and snoring. A child with a score of  $<-1$  had no OSAS, whereas a child with a score  $>3.5$  had OSAS; scores between  $-1$  and  $3.5$  were indeterminate. In our study, control subjects with an OSAS score  $\geq -1$  were excluded.

### Questionnaires

Two questionnaires (a modified ESS and the Conners Abbreviated Symptom Questionnaire for hyperactivity) were administered to the child's caregiver by a trained research assistant. In addition, questions were asked directly to the first 46 children  $\geq 6$  years of age.

The ESS is a measure of a person's general level of daytime sleepiness.<sup>14</sup> It is an 8-item questionnaire detailing an individual's propensity to fall asleep during commonly encountered situations. Scores can range from 0 to 24. In adults, an ESS score  $>10$  is taken to indicate increased daytime sleepiness.<sup>14</sup> The ESS was modified slightly in this study to be more applicable to children. The mention of alcohol was deleted in question number 7. In addition, question 8 was taken to indicate that the subject was a passenger in the car (Appendix 1).

The Conners Abbreviated Symptom Questionnaire for hyperactivity is a 10-item index from the Revised Conners Parent Rating Scale.<sup>17</sup> This is used in rating children who are aged 3 to 17 years for the presence of inattention, distractibility, and overactivity. Raw scores may range from 0 to 30, with a score of 15 considered clinically relevant (Appendix 2).

### PSG

Patients with S-SDB underwent an overnight polysomnogram. Control subjects did not undergo PSG. Standard PSG consisted of electroencephalogram (C3A2/C3O1); electromyogram (submental and tibial); electrooculogram (right, left); arterial oxygen saturation (Sao<sub>2</sub>), oximeter pulse wave form, and end-tidal carbon dioxide tension (ETCO<sub>2</sub>); oronasal airflow using a thermistor; and thoracic and abdominal wall motion (piezo belts or respiratory inductance plethysmography). Sleep was staged based on the criteria of Rechtschaffen and Kales.<sup>18</sup> Arousals were scored according to the American Sleep Disorders Association criteria.<sup>19</sup> Standard pediatric scoring criteria were used for respiratory events.<sup>1</sup> Hypopneas were scored when there was a decrease in airflow  $\geq 50\%$  associated with either a 3% desaturation or an arousal.<sup>1</sup> The apnea-hypopnea index was defined as the total number of obstructive apneas, hypopneas, and mixed apneas per hour of sleep. OSAS was defined as an obstructive apnea index  $\geq 1$ /hour.<sup>17</sup> Severity of OSAS was classified on the basis of the obstructive apnea index, with mild OSAS having an obstructive index between 1 and 4/hour, moderate OSAS 5 and 9/hour, and severe OSAS  $\geq 10$ /hour.<sup>20</sup> Primary snoring (PS) was defined as snoring without episodes of apnea, desaturation, hypoventilation, or excessive arousals.<sup>21</sup> Periodic limb movements (PLMs) were scored using the International Classification of Sleep Disorders (Revised) criteria.<sup>21</sup> The scorer was blinded to the results of the questionnaires.

### Statistical Analysis

Data were expressed as means and standard deviations, where appropriate.  $\chi^2$  analysis was used for categorical variables. The unpaired *t* test was used to compare ESS scores of patients with S-SDB versus control subjects, as well as the Conners scores of patients with S-SDB versus control subjects. The ESS scores of children who were younger than 5 years were also analyzed separately as children in this age group usually take daytime naps. To assess for the contribution of puberty to the degree of daytime sleepiness in our subjects, we analyzed separately the ESS scores of children who were older than 12 years (which was arbitrarily set as the cutoff age for puberty). One-way analysis of variance was performed to test the difference in ESS scores of patients with

mild, moderate, and severe OSAS. Similarly, one-way analysis of variance was used to test the difference in Conners scores between patients with mild, moderate, and severe OSAS. As the Conners score has been studied only in children 3 to 17 years of age, data were reanalyzed with subjects younger than 3 years excluded. The Spearman correlation coefficient was used to describe the relationship between the ESS score and PSG variables, as well as between the Conners score and PSG variables. PSG variables evaluated include sleep efficiency, arousal index, apnea-hypopnea index, apnea-hypopnea index during rapid eye movement (REM) sleep, Sao<sub>2</sub> nadir, duration of Sao<sub>2</sub>  $\leq 92\%$ , mean ETCO<sub>2</sub>, mean ETCO<sub>2</sub> during REM sleep, peak ETCO<sub>2</sub>, duration of ETCO<sub>2</sub>  $\geq 50$  mm Hg, and PLM index. A Bonferroni correction for multiple comparisons was used.

## RESULTS

### Study Group

Of all subjects who were approached to join the study, only 1 family refused. A total of 203 consecutive children were recruited; 23 were excluded. Among the patients with S-SDB, 18 were excluded. Seventeen of these children failed to undergo a sleep study, and 1 had a sleep study done at another institution. Among the control subjects, 5 were excluded because of an OSAS score  $>-1$ . Therefore, 108 patients with S-SDB and 72 control subjects composed the study population. The 2 groups were not statistically different on the basis of age, gender, race, and type of insurance (Table 1). The type of insurance was used as a surrogate measure of socioeconomic status. Snoring was present in all but 1 of the patients with S-SDB. Twenty-two patients had a history of daytime sleepiness by parental report.

### ESS and Conners Score

The first 46 children who were  $\geq 6$  years of age gave separate ESS scores from their parents. As the correlation between parent and child ESS score was good ( $r = 0.71$ ,  $P < .001$ ), subsequent ESS scores were obtained from the accompanying caregiver alone. The mean ESS score given by parents of patients with S-SDB was significantly higher than that of control subjects ( $8.1 \pm 4.9$  vs  $5.3 \pm 3.9$ ;  $P < .001$ ; Fig 1). Taking an ESS score  $>10$  as the cutoff for increased daytime sleepiness, 32 (28%) patients with S-SDB and 9 (12%) control subjects had EDS ( $P < .007$ ). There was no significant difference in the ESS scores of patients who had S-SDB and were younger than 5 years and those who were 5 years and older ( $8.2 \pm 4.2$  vs  $8.1 \pm 5.2$ , respectively). Likewise, the ESS scores of children who had S-SDB and were  $\leq 12$

TABLE 1. Demographic Data of Study Population

|                               | Patients With S-SDB | Controls         |
|-------------------------------|---------------------|------------------|
| N                             | 108                 | 72               |
| Age, y, mean $\pm$ SD (range) | 7 $\pm$ 4 (2–16)    | 8 $\pm$ 4 (2–17) |
| Female gender, n (%)          | 58 (55)             | 43 (60)          |
| Race, n (%)                   |                     |                  |
| White                         | 26 (24)             | 26 (36)          |
| Black                         | 79 (73)             | 46 (64)          |
| Other                         | 3 (3)               | 0 (0)            |
| Private insurance, n (%)      | 37 (34)             | 28 (39)          |

There was no statistical difference between patients with S-SDB and control subjects on the basis of age, gender, race, and type of insurance. The type of insurance was used as a surrogate measure of socioeconomic status.

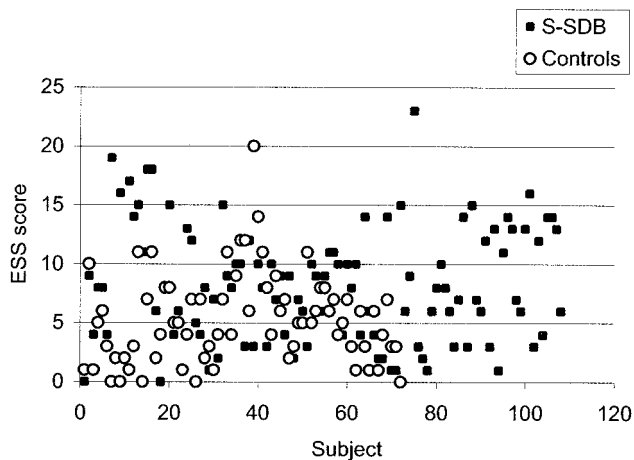

Fig 1. The ESS score of patients with S-SDB was higher than the score of control subjects ( $P < .001$ ).

years ( $8.1 \pm 4.8$ ) were not statistically different from the ESS scores of those who were older than 12 years ( $8.4 \pm 6.6$ ). The ESS scores of patients with S-SDB and control subjects who were younger than 5 years ( $8.2 \pm 4.2$  vs  $8.0 \pm 4.2$ ) were not significantly different, but the ESS scores of patients who had S-SDB and control subjects who were older than 12 years ( $8.4 \pm 6.6$  vs  $4.3 \pm 2.6$ ) were ( $P < .05$ ).

The Conners score of patients with S-SDB ( $12.8 \pm 7.6$ ) was significantly higher ( $P < .001$ ) than the score of control subjects ( $9.0 \pm 6.2$ ; Fig 2), although it was lower than the score considered clinically relevant. Excluding children  $<3$  years of age, the significant difference between the Conners score of patients with S-SDB and controls persisted ( $13.0 \pm 7.5$  vs  $9.0 \pm 6.3$ , respectively).

#### Subgroup Analysis

The PSG results are shown in Table 2. Of the 108 patients with clinically S-SDB, 63 (58%) received a diagnosis of PS on overnight PSG. The remaining 45 (42%) had various degrees of OSAS. Twenty-one had mild, 8 had moderate, and 16 had severe OSAS. None of the patients with S-SDB fulfilled the criteria for PLM disorder. The ESS score of patients with

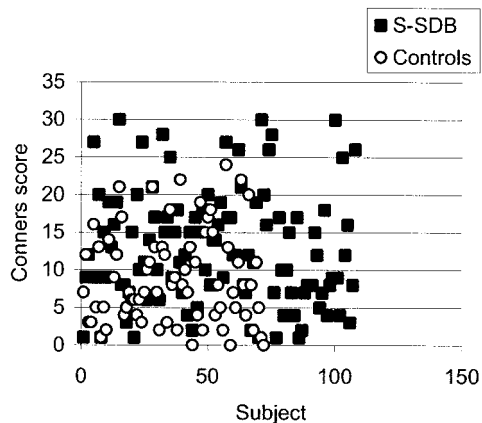

Fig 2. The Conners score of patients with S-SDB was higher than the score of control subjects ( $P < .001$ ).

TABLE 2. PSG Results of Children With S-SDB

| PSG Parameter                           | Mean $\pm$ SD (range) |
|-----------------------------------------|-----------------------|
| Sleep efficiency, %                     | $83 \pm 12$ (39–97)   |
| Arousal index, n/h                      | $10 \pm 8$ (1–53)     |
| Apnea-hypopnea index, n/h               | $8 \pm 18$ (0–48.2)   |
| REM apnea-hypopnea index, n/h REM sleep | $17 \pm 30$ (0–148.2) |
| REM obstructive index, n/h REM sleep    | $10 \pm 20$ (0–107.5) |
| Peak ETco <sub>2</sub> , mmHg           | $52 \pm 5$ (41–67)    |
| Sao <sub>2</sub> nadir, %               | $88 \pm 10$ (48–98)   |
| Mean Sao <sub>2</sub> , %               | $98 \pm 2$ (88–100)   |
| Mean Sao <sub>2</sub> (REM sleep), %    | $97 \pm 3$ (73–100)   |
| PLM index, n/h                          | $0.3 \pm 0.8$ (0–3.3) |

OSAS ( $8.3 \pm 5.6$ ) was not statistically different from the ESS score of those who had a diagnosis of PS alone ( $8.0 \pm 4.5$ ). There was also no difference between the ESS score of patients with mild, moderate, and severe OSAS (Fig 3). Similarly, the Conners score was not statistically different between patients with OSAS and those with PS ( $12.6 \pm 8.3$  and  $13.0 \pm 7.0$  for OSAS and PS respectively). There was also no statistically significant difference in the Conners scores of patients with mild, moderate, and severe OSAS (Fig 4).

In children with OSAS, the ESS score had a statistically significant but weak correlation with the mean Sao<sub>2</sub> during REM sleep ( $r = -0.41$ ,  $P < .05$ ), PLM index ( $r = 0.40$ ,  $P < .05$ ), apnea-hypopnea index ( $r = 0.32$ ,  $P < .05$ ), mean Sao<sub>2</sub> ( $r = -0.31$ ,  $P < .05$ ), and Sao<sub>2</sub> nadir ( $r = -0.31$ ,  $P < .05$ ) but not with other parameters tested (Table 3). However, when the  $P$  value was adjusted for multiple comparisons using the Bonferroni correction factor, these correlations failed to reach significance. There was no significant correlation between the Conners score and PSG parameters.

As most children with OSAS obstruct primarily during REM sleep,<sup>22</sup> data were reanalyzed using the apnea-hypopnea index during REM sleep. No significant correlation was found between the ESS or Conners scores and the REM apnea-hypopnea index. However, ESS scores correlated with the mean Sao<sub>2</sub> during REM sleep.

#### DISCUSSION

To our knowledge, this is the first study to evaluate the use of the ESS score in children. We have shown that children with S-SDB were sleepier than age-, gender-, and race-matched control subjects. Our data also confirmed previous reports that children with S-SDB exhibit more symptoms of attention-deficit/hyperactivity disorder than normal children. PSG parameters correlated only weakly with the ESS score and had no significant correlation with hyperactivity.

#### Daytime Sleepiness

EDS is a cardinal feature of adult OSAS.<sup>21</sup> In children, it is relatively uncommon, but its reported prevalence has varied over a wide range.<sup>7,9–12</sup> Although the mean ESS score of children with S-SDB

Fig 3. One-way analysis of variance revealed that the ESS scores of patients with mild, moderate, and severe OSAS did not differ significantly.

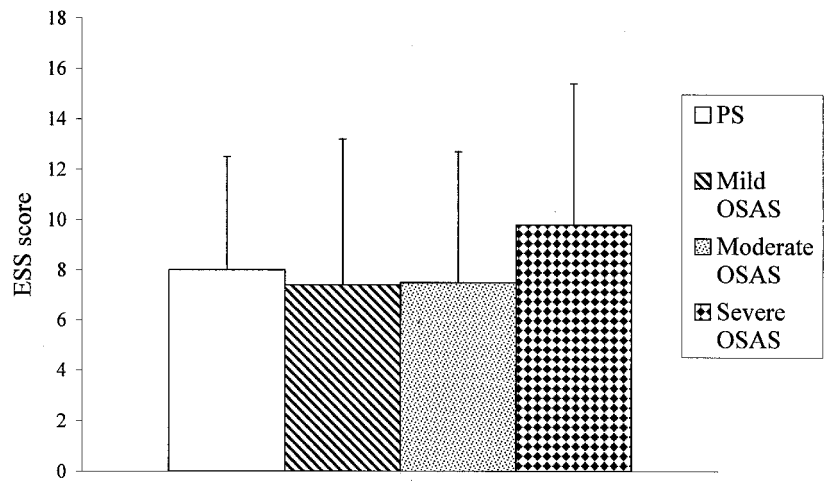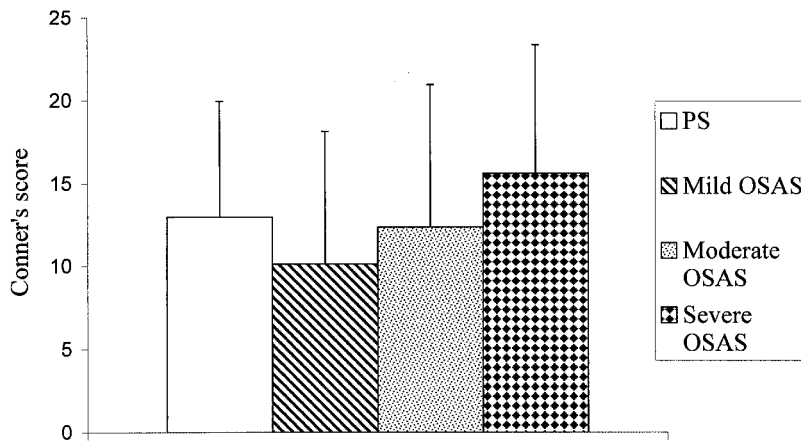

Fig 4. One-way analysis of variance revealed that the Conners scores of patients with mild, moderate, and severe OSAS did not differ significantly.

TABLE 3. Correlation Between PSG Parameters and ESS and Conners Scores

| PSG Parameter                             | Correlation With ESS Score (r) | Correlation With Conners Score (r) |
|-------------------------------------------|--------------------------------|------------------------------------|
| Sleep efficiency, %                       | -0.05                          | -0.09                              |
| Arousal index, n/h                        | 0.25                           | 0.04                               |
| Apnea-hypopnea index, n/h                 | 0.32*                          | 0.24                               |
| REM apnea-hypopnea index, n/h             | 0.26                           | 0.13                               |
| REM obstructive apnea index, n/h          | 0.24                           | 0.19                               |
| Peak ETco <sub>2</sub> , mm Hg            | 0.19                           | 0.29                               |
| Mean ETco <sub>2</sub> , mm Hg            | 0.04                           | 0.12                               |
| Mean ETco <sub>2</sub> , REM sleep, mm Hg | 0.13                           | 0.19                               |
| Duration ETco <sub>2</sub> ≥50 mm Hg, min | -0.06                          | 0.03                               |
| Sao <sub>2</sub> nadir, %                 | -0.31*                         | -0.22                              |
| Mean Sao <sub>2</sub> , %                 | -0.31*                         | -0.16                              |
| Mean Sao <sub>2</sub> , REM sleep, %      | -0.41*                         | -0.27                              |
| Duration Sao <sub>2</sub> ≤92%, min       | 0.13                           | -0.03                              |
| PLM index, n/h                            | 0.40*                          | 0.25                               |

\*  $P < .05$ .

did not reach the level generally set for EDS based on adult studies (ESS >10),<sup>14</sup> it was statistically higher than the ESS score of control subjects. Therefore, as a group, we have shown that children with S-SDB are relatively sleepy compared with nonsnoring control subjects.

An interesting finding was the lack of a significant difference between the ESS scores of children with S-SDB and control subjects who were younger than 5

years. That children in this age group usually nap during the day may account for this lack of difference in parental perception of sleepiness.

After classifying children who were referred for S-SDB into those with PS and those with OSAS, there was no significant difference in daytime sleepiness between these 2 groups. Daytime symptoms are traditionally thought to be absent in patients with PS.<sup>21</sup> Our results, however, suggest that snoring may in

itself be associated with sleepiness in children. Similar findings have been shown in adult studies.<sup>23,24</sup> In a cross-sectional cohort of 5777 adults, the authors found that snoring was independently associated with excess sleepiness.<sup>23</sup> In another adult study, daytime sleepiness, as measured by both ESS and multiple sleep latency test, was compared between normal controls and patients with either upper airway resistance syndrome (UARS), sleep hypopnea syndrome, or OSAS.<sup>25</sup> There was a significant difference between the ESS scores of the controls versus the patients with SDB. However, the ESS and multiple sleep latency test were similar for the 3 patient groups.

Classifying the children with OSAS in our study according to severity did not yield a significant relationship between the severity of OSAS and the degree of daytime sleepiness. It is possible that children may have varying susceptibility to the effects of OSAS severity, accounting for the lack of relationship. Previous studies have shown conflicting results in this area. Some adult studies have similarly shown this lack of relationship,<sup>26–28</sup> whereas others have shown a positive relationship between OSAS severity and the degree of sleepiness.<sup>13,29</sup> As there were only a small number of children with moderate to severe OSAS, it is also possible that our study was underpowered to detect a significant relationship.

#### Relationship Between PSG Parameters and Daytime Sleepiness

We found weak correlations between daytime sleepiness and the mean  $\text{Sao}_2$  during REM sleep, PLM index, the apnea-hypopnea index, and the lowest recorded  $\text{Sao}_2$ . There was no significant relationship between daytime sleepiness and sleep efficiency or the arousal index.

The link between the ESS score and PSG parameters is unclear. Some studies have shown significant correlation between these, whereas others have not. In adults with OSAS, sleep fragmentation as a result of recurrent arousal is thought to be the primary reason for EDS.<sup>30,31</sup> Other factors have also been shown to correlate with daytime sleepiness, such as nocturnal hypoxemia and the apnea-hypopnea index.<sup>32,33</sup> In our study, none of the PSG parameters could be used to predict daytime sleepiness, as the correlations were weak. Similar findings have been shown in a number of adult studies.<sup>26,27,34</sup>

The PLM disorder, defined as a PLM index  $\geq 5$ , is believed to cause daytime sleepiness due to recurrent arousals, resulting in sleep fragmentation.<sup>21</sup> Although none of the patients in the present study satisfied the criteria for this disorder, the PLM index showed a weak correlation with daytime sleepiness (Table 2). With this weak correlation, it is unlikely that PLMs contribute significantly to the daytime sleepiness in children with S-SDB. Using both objective and subjective measures of daytime sleepiness, a recent study also showed comparable findings.<sup>35</sup>

The absence of a strong relation between PSG pa-

rameters and daytime sleepiness in this study brings up the possibility either that we are not measuring the right parameter during routine PSG or that the commonly measured parameters in PSG are not sensitive determinants of daytime sleepiness. Sleep fragmentation seems not to be a major factor in the development of daytime sleepiness in children with OSAS, as there was no significant correlation between daytime sleepiness and the arousal index. In fact, previous studies have shown that apneas in children are terminated by arousal less often than in adults, leading to less fragmented sleep.<sup>36</sup> Theoretically, measures of increased upper airway resistance, such as esophageal pressure swings, may be more sensitive determinants of daytime sleepiness.

UARS, which is part of the spectrum of SDB, is characterized by EDS as a result of fragmented sleep caused by brief arousals not associated with discrete apneas or gas exchange abnormalities.<sup>25</sup> It is diagnosed by demonstrating an association between esophageal pressure swings and arousals.<sup>37</sup> As esophageal pressure was not measured in this study, it is possible that some of the subjects who were labeled as PS may actually have had UARS. However, in that case, we would have expected to see a correlation between the arousal index and the ESS score.

Alternatively, subcortical arousals that have been shown to be common in children may also be contributing to sleepiness.<sup>38</sup> The pulse transit time, which is a noninvasive measure of subcortical arousal, was found to be a more sensitive measure of sleep disruption than visible electroencephalogram (EEG) arousals.<sup>39</sup> In addition, significant changes in spectral EEG characteristics have been shown in obstructive events not terminated by EEG arousal.<sup>40</sup> These measures of subcortical arousal, which are not part of the routinely measured parameters on PSG and were not analyzed in this study, may perhaps have a stronger relation with daytime sleepiness. This may be an area for future research. With the correlation, although weak, between sleepiness and oxygen saturation, hypoxemia may play a bigger role in the cause of sleepiness in children with SDB than EEG arousals.

#### Attention Deficit and Hyperactivity

On the basis of the Conners score, we found that children with S-SDB had more symptoms of attention-deficit/hyperactivity disorder than control subjects (Fig 2). There was no difference in attention-deficit/hyperactivity symptoms between the PS and OSAS groups.

These data confirm previous reports that children with SDB commonly manifest neurobehavioral complications, specifically hyperactivity and inattention.<sup>2,5,41–43</sup> It is interesting that the Conners score of children with OSAS was not statistically different from the Conners score of children with PS alone. Similar findings were shown in a recent study of 113 children who were referred for S-SDB.<sup>42</sup> There was no difference in the hyperactivity scores of children

who subsequently received a diagnosis of SDB by polysomnography and those without. These findings suggest that snoring by itself may affect a child's daytime behavior.

None of the PSG parameters measured in our study correlated to a significant degree with symptoms of attention-deficit/hyperactivity disorder. Likewise, Chervin et al<sup>42</sup> found no correlation between hyperactivity and respiratory parameters on PSG. However, they found a correlation between hyperactivity and the PLM index. This association was found only in patients with SDB.

The absence of a relation between PSG parameters and symptoms of attention deficit and hyperactivity again indicates that we may be measuring the wrong parameters or that commonly measured parameters on nocturnal PSG are not sensitive determinants of hyperactivity. Hyperactivity has been proposed to be a child's way of acting out daytime sleepiness. As such, measures of subcortical arousal associated with respiratory events may give better correlations with hyperactivity.

It is important to note that we excluded children who were taking medications that could affect their level of alertness, including those who were taking drugs used for attention-deficit/hyperactivity disorder. As such, our data may have underestimated attention-deficit and hyperactivity in children with S-SDB. In addition, differences in birth history and other medical conditions may have played a role. However, as we excluded those with significant medical conditions, it is unlikely that these factors played a major role.

#### Study Limitations

This study compared clinically referred children with S-SDB with control subjects from other clinics. Thus, clinical referral bias may account for the difference in ESS and Conners scores between patients and control subjects. The ESS and the Conners score are subjective methods of assessing sleepiness and hyperactivity and as such may also be prone to report bias. Of note, however, is that only 22 of the 108 patients with S-SDB had a history of daytime sleepiness by parental report. Most children presented with chief complaints of snoring and witnessed apnea during sleep. Furthermore, all children were seen by a sleep specialist, and children with other types of sleep disorders were excluded. Nevertheless, it would be important to confirm these results with a population-based study.

Our control subjects did not undergo a sleep study but were screened for OSAS on the basis of history using the OSAS score developed by Brouillette et al.<sup>16</sup> This score has been shown to differentiate an individual with no SDB from one with OSAS, although it has not been shown to be effective at differentiating PS from OSAS.

The use of a thermistor to measure nasal airflow has its limitations. Being a qualitative measurement, it is not as sensitive in detecting flow limitation, which may be associated with increased upper airway resistance or hypopneas.<sup>1</sup> Nasal cannula pres-

sure measurements, which have been validated in adults,<sup>44</sup> have been shown to detect apneas, hypopneas, and flow-limited events not identified by thermistors in children.<sup>45,46</sup> However, as this detects only nasal airflow, it may miss events in children who frequently mouth-breathe<sup>45,46</sup> and in those who experience nasal obstruction.<sup>47</sup> As such, to minimize the limitations associated with the use of a thermistor, we used the ETco<sub>2</sub> wave form as an additional means of measuring airflow.

It should be noted that the majority of subjects in both the S-SDB and control groups were black, reflecting the ethnic mix of our hospital's clinical population. Thus, the study sample may not be representative of the rest of the United States.

#### CONCLUSIONS

In summary, we have shown that although the mean ESS score of patients was within the normal range for adults, children with S-SDB were sleepier and more hyperactive than control subjects. These findings have important implications in clinical practice as we have shown that even the mildest form of SDB may be associated with daytime symptoms. The long-term consequence of this is currently unknown, but it is possible that the neurocognitive functioning of a child may be affected. We have also shown that the ESS is a simple and useful test to administer to children. However, the results of this study need to be confirmed by a population-based study with a more representative population. Additional studies are needed to elucidate the causative factors for EDS and hyperactivity in children with S-SDB.

#### APPENDIX 1: MODIFIED EPWORTH SLEEPINESS SCALE

How likely are you/your child to doze off or fall asleep in the following situations, in contrast to feeling just tired? This refers to your usual way of life in recent times. Even if you/your child have not done some of these things recently, try to work out how they would have affected you/your child. Use the following scale to choose the most appropriate number for each situation:

- 0 = no chance of dozing
- 1 = slight chance of dozing
- 2 = moderate chance of dozing
- 3 = high chance of dozing

| Situation                                                           | Chance of Dozing |
|---------------------------------------------------------------------|------------------|
| Sitting and reading                                                 |                  |
| Watching TV                                                         |                  |
| Sitting inactive in a public place (eg, movie theater or a meeting) |                  |
| As a passenger in a car for an hour without a break                 |                  |
| Lying down to rest in the afternoon when circumstances permit       |                  |
| Sitting and talking to someone                                      |                  |
| Sitting quietly after lunch                                         |                  |
| In a car, while stopped for a few minutes in traffic                |                  |

## APPENDIX 2: CONNERS ABBREVIATED SYMPTOM QUESTIONNAIRE

| Observation                                                  | Not at All | Just a Little | Pretty Much | Very Much |
|--------------------------------------------------------------|------------|---------------|-------------|-----------|
| 1. Restless or overactive                                    |            |               |             |           |
| 2. Excitable, impulsive                                      |            |               |             |           |
| 3. Disturbs other children                                   |            |               |             |           |
| 4. Fails to finish things he/she starts—short attention span |            |               |             |           |
| 5. Constantly fidgeting                                      |            |               |             |           |
| 6. Inattentive, easily distracted                            |            |               |             |           |
| 7. Demands must be met immediately—easily frustrated         |            |               |             |           |
| 8. Cries often and easily                                    |            |               |             |           |
| 9. Mood changes quickly and drastically                      |            |               |             |           |
| 10. Temper outbursts, explosive and unpredictable behavior   |            |               |             |           |

### ACKNOWLEDGMENTS

This study was funded through National Heart, Lung, and Blood Institute Grant HL 58585.

We thank all of the children and their parents who participated in this study.

### REFERENCES

- Standards and indications for cardiopulmonary sleep studies in children. American Thoracic Society. *Am J Respir Crit Care Med.* 1996;153:866–878
- Ali NJ, Pitson DJ, Stradling JR. Snoring, sleep disturbance, and behaviour in 4-5 year olds. *Arch Dis Child.* 1993;68:360–366
- Redline S, Tishler PV, Schluchter M, Aylor J, Clark K, Graham G. Risk factors for sleep-disordered breathing in children. Associations with obesity, race, and respiratory problems. *Am J Respir Crit Care Med.* 1999;159:1527–1532
- Cardiorespiratory sleep studies in children. Establishment of normative data and polysomnographic predictors of morbidity. American Thoracic Society. *Am J Respir Crit Care Med.* 1999;160:1381–1387
- Ali NJ, Pitson D, Stradling JR. Sleep disordered breathing: effects of adenotonsillectomy on behaviour and psychological functioning. *Eur J Pediatr.* 1996;155:56–62
- Gozal D. Sleep-disordered breathing and school performance in children. *Pediatrics.* 1998;102:616–620
- Marcus CL, Carroll JL. Obstructive sleep apnea syndrome. In: Loughlin GM, Eigen H, eds. *Respiratory Disease in Children: Diagnosis and Management.* Baltimore, MD: Williams & Wilkins; 1994:475–499
- Arens R. Obstructive sleep apnea in childhood: clinical features. In: Loughlin GM, Carroll J, Marcus CL, eds. *Sleep and Breathing in Children: A Developmental Approach.* New York, NY: Marcel Dekker; 2000:575–600
- Frank Y, Kravath RE, Pollak CP, Weitzman ED. Obstructive sleep apnea and its therapy: clinical and polysomnographic manifestations. *Pediatrics.* 1983;71:737–742
- Rosen CL. Clinical features of obstructive sleep apnea hypoventilation syndrome in otherwise healthy children. *Pediatr Pulmonol.* 1999;27:403–409
- Carroll J, Loughlin GM. Obstructive sleep apnea syndrome in infants and children: clinical features and pathophysiology. In: Ferber R, Kryger M, eds. *Principles and Practice of Sleep Medicine in the Child.* Philadelphia, PA: WB Saunders Company; 1995:163–191
- Guilleminault C, Korobkin R, Winkle R. A review of 50 children with obstructive sleep apnea syndrome. *Lung.* 1981;159:275–287
- Gozal D, Wang M, Pope DW Jr. Objective sleepiness measures in pediatric obstructive sleep apnea. *Pediatrics.* 2001;108:693–697
- Johns MW. A new method for measuring daytime sleepiness: the Epworth sleepiness scale. *Sleep.* 1991;14:540–545
- Johns MW. Reliability and factor analysis of the Epworth Sleepiness Scale. *Sleep.* 1992;15:376–381
- Brouillette R, Hanson D, David R, et al. A diagnostic approach to suspected obstructive sleep apnea in children. *J Pediatr.* 1984;105:10–14
- Casat CD, Norton HJ, Boyle-Whitesel M. Identification of elementary

- school children at risk for disruptive behavioral disturbance: validation of a combined screening method. *J Am Acad Child Adolesc Psychiatry.* 1999;38:1246–1253
- Rechtschaffen A, Kales A. *A Manual of Standardized Terminology, Techniques and Scoring Systems for Sleep Stages of Human Subjects.* Los Angeles, CA: UCLA Brain Information Service/Brain Research Institute; 1968
  - EEG arousals: scoring rules and examples: a preliminary report from the Sleep Disorders Atlas Task Force of the American Sleep Disorders Association. *Sleep.* 1992;15:173–184
  - Katz ES, Greene MG, Carson KA, et al. Night-to-night variability of polysomnography in children with suspected obstructive sleep apnea. *J Pediatr.* 2002;140:589–594
  - American Sleep Disorders Association. *International Classification of Sleep Disorders, Revised: Diagnostic and Coding Manual.* Rochester, MN: American Sleep Disorders Association; 1997
  - Goh DY, Galster P, Marcus CL. Sleep architecture and respiratory disturbances in children with obstructive sleep apnea. *Am J Respir Crit Care Med.* 2000;162:682–686
  - Gottlieb DJ, Yao Q, Redline S, Ali T, Mahowald MW. Does snoring predict sleepiness independently of apnea and hypopnea frequency? *Am J Respir Crit Care Med.* 2000;162:1512–1517
  - Guilleminault C, Do KY, Chowdhuri S, Horita M, Ohayon M, Kushida C. Sleep and daytime sleepiness in upper airway resistance syndrome compared to obstructive sleep apnoea syndrome. *Eur Respir J.* 2001;17:838–847
  - Guilleminault C, Stoohs R, Clerk A, Cetel M, Maistros P. A cause of excessive daytime sleepiness. The upper airway resistance syndrome. *Chest.* 1993;104:781–787
  - Cheshire K, Engleman H, Deary I, Shapiro C, Douglas NJ. Factors impairing daytime performance in patients with sleep apnea/hypopnea syndrome. *Arch Intern Med.* 1992;152:538–541
  - Guilleminault C, Partinen M, Quera-Salva MA, Hayes B, Dement WC, Nino-Murcia G. Determinants of daytime sleepiness in obstructive sleep apnea. *Chest.* 1988;94:32–37
  - Kingshott RN, Sime PJ, Engleman HM, Douglas NJ. Self assessment of daytime sleepiness: patient versus partner. *Thorax.* 1995;50:994–995
  - Gottlieb DJ, Whitney CW, Bonekat WH, et al. Relation of sleepiness to respiratory disturbance index: the Sleep Heart Health Study. *Am J Respir Crit Care Med.* 1999;159:502–507
  - Colt HG, Haas H, Rich GB. Hypoxemia vs sleep fragmentation as cause of excessive daytime sleepiness in obstructive sleep apnea. *Chest.* 1991;100:1542–1548
  - Roehrs T, Zorick F, Wittig R, Conway W, Roth T. Predictors of objective level of daytime sleepiness in patients with sleep-related breathing disorders. *Chest.* 1989;95:1202–1206
  - Chervin RD, Aldrich MS. Characteristics of apneas and hypopneas during sleep and relation to excessive daytime sleepiness. *Sleep.* 1998;21:799–806
  - Punjabi NM, O'Hearn DJ, Neubauer DN, et al. Modeling hypersomnolence in sleep-disordered breathing. A novel approach using survival analysis. *Am J Respir Crit Care Med.* 1999;159:1703–1709
  - Kingshott RN, Engleman HM, Deary IJ, Douglas NJ. Does arousal frequency predict daytime function? *Eur Respir J.* 1998;12:1264–1270
  - Chervin RD. Periodic leg movements and sleepiness in patients evaluated for sleep-disordered breathing. *Am J Respir Crit Care Med.* 2001;164:1454–1458
  - McNamara F, Issa FG, Sullivan CE. Arousal pattern following central and obstructive breathing abnormalities in infants and children. *J Appl Physiol.* 1996;81:2651–2657
  - Exar EN, Collop NA. The upper airway resistance syndrome. *Chest.* 1999;115:1127–1139
  - Mogras MA, Ducharme FM, Brouillette RT. Movement/arousals. Description, classification, and relationship to sleep apnea in children. *Am J Respir Crit Care Med.* 1994;150:1690–1696
  - Katz ES, Lutz J, Marcus CL. Pulse transit time as a measure of arousal and respiratory effort in children with sleep-disordered breathing. *J Pediatr Res.* 2002;52:580–588
  - Bandla HP, Gozal D. Dynamic changes in EEG spectra during obstructive apnea in children. *Pediatr Pulmonol.* 2000;29:359–365
  - Chervin RD, Dillon JE, Bassetti C, Ganoczy DA, Pituch KJ. Symptoms of sleep disorders, inattention, and hyperactivity in children. *Sleep.* 1997;20:1185–1192
  - Chervin RD, Archbold KH. Hyperactivity and polysomnographic findings in children evaluated for sleep-disordered breathing. *Sleep.* 2001;24:313–320

43. Chervin RD, Archbold KH, Dillon JE, et al. Inattention, hyperactivity, and symptoms of sleep-disordered breathing. *Pediatrics*. 2002;109:449–456
44. Hosselet JJ, Norman RG, Ayappa I, Rapoport DM. Detection of flow limitation with a nasal cannula/pressure transducer system. *Am J Respir Crit Care Med*. 1998;157:1461–1467
45. Serebrisky D, Cordero R, Mandeli J, Kattan M, Lamm C. Assessment of inspiratory flow limitation in children with sleep-disordered breathing by a nasal cannula pressure transducer system. *Pediatr Pulmonol*. 2002;33:380–387
46. Trang H, Leske V, Gaultier C. Use of nasal cannula for detecting sleep apneas and hypopneas in infants and children. *Am J Respir Crit Care Med*. 2002;166:464–468
47. Heitman SJ, Atkar RS, Hajduk EA, Wanner RA, Flemons WW. Validation of nasal pressure for the identification of apneas/hypopneas during sleep. *Am J Respir Crit Care Med*. 2002;166:386–391

### EUROPEAN ENVIRONMENTAL RULES PROPEL CHANGE IN U.S.

“Generally stricter European laws reflect a different philosophical approach to regulation, says Dr Indra Spiecker, a lawyer specializing in comparative law and assistant professor for American law at the University of Osnabruck in Germany. American lawmakers primarily look to cost-benefit analysis, which holds that the benefit of imposing regulation should outweigh its cost. European nations have more readily embraced what is called the precautionary principle. Essentially, Europeans emphasize the cost of inaction, while Americans tend to focus on the cost of action. . . . The EU is now considering sweeping new regulation of its chemical industry that has unleashed what analysts here say is the biggest lobbying effort in Brussels ever mounted by American industry. The new law, known as Reach, would place the burden of proof of safety on the producers before its sale, rather than waiting for the problems to spur regulation later. It would force American chemical companies to comply with the legislation in order to continue exporting to Europe—and raises the fear of similar legislation in the United States. The chemical industry points out that few if any of the unregulated chemicals are causing obvious health crises and says the legislation is overly bureaucratic and expensive. The American Chemical Council has marshaled its members to alter or derail the legislation.”

Pohl O. *New York Times*. July 6, 2004

Noted by JFL, MD



## Daytime Sleepiness and Hyperactivity in Children With Suspected Sleep-Disordered Breathing

Cecilia S. Melendres, Janita M. Lutz, Eric D. Rubin and Carole L. Marcus

*Pediatrics* 2004;114;768

DOI: 10.1542/peds.2004-0730

|                                           |                                                                                                                                                                                                                                                                             |
|-------------------------------------------|-----------------------------------------------------------------------------------------------------------------------------------------------------------------------------------------------------------------------------------------------------------------------------|
| <b>Updated Information &amp; Services</b> | including high resolution figures, can be found at:<br><a href="http://pediatrics.aappublications.org/content/114/3/768.full.html">http://pediatrics.aappublications.org/content/114/3/768.full.html</a>                                                                    |
| <b>References</b>                         | This article cites 42 articles, 9 of which can be accessed free at:<br><a href="http://pediatrics.aappublications.org/content/114/3/768.full.html#ref-list-1">http://pediatrics.aappublications.org/content/114/3/768.full.html#ref-list-1</a>                              |
| <b>Citations</b>                          | This article has been cited by 18 HighWire-hosted articles:<br><a href="http://pediatrics.aappublications.org/content/114/3/768.full.html#related-urls">http://pediatrics.aappublications.org/content/114/3/768.full.html#related-urls</a>                                  |
| <b>Subspecialty Collections</b>           | This article, along with others on similar topics, appears in the following collection(s):<br><b>Pulmonology</b><br><a href="http://pediatrics.aappublications.org/cgi/collection/pulmonology_sub">http://pediatrics.aappublications.org/cgi/collection/pulmonology_sub</a> |
| <b>Permissions &amp; Licensing</b>        | Information about reproducing this article in parts (figures, tables) or in its entirety can be found online at:<br><a href="http://pediatrics.aappublications.org/site/misc/Permissions.xhtml">http://pediatrics.aappublications.org/site/misc/Permissions.xhtml</a>       |
| <b>Reprints</b>                           | Information about ordering reprints can be found online:<br><a href="http://pediatrics.aappublications.org/site/misc/reprints.xhtml">http://pediatrics.aappublications.org/site/misc/reprints.xhtml</a>                                                                     |

PEDIATRICS is the official journal of the American Academy of Pediatrics. A monthly publication, it has been published continuously since 1948. PEDIATRICS is owned, published, and trademarked by the American Academy of Pediatrics, 141 Northwest Point Boulevard, Elk Grove Village, Illinois, 60007. Copyright © 2004 by the American Academy of Pediatrics. All rights reserved. Print ISSN: 0031-4005. Online ISSN: 1098-4275.

American Academy of Pediatrics

DEDICATED TO THE HEALTH OF ALL CHILDREN™

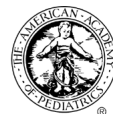

## A New Method for Measuring Daytime Sleepiness: The Epworth Sleepiness Scale

Murray W. Johns

*Sleep Disorders Unit, Epworth Hospital, Melbourne, Victoria, Australia*

---

**Summary:** The development and use of a new scale, the Epworth sleepiness scale (ESS), is described. This is a simple, self-administered questionnaire which is shown to provide a measurement of the subject's general level of daytime sleepiness. One hundred and eighty adults answered the ESS, including 30 normal men and women as controls and 150 patients with a range of sleep disorders. They rated the chances that they would doze off or fall asleep when in eight different situations commonly encountered in daily life. Total ESS scores significantly distinguished normal subjects from patients in various diagnostic groups including obstructive sleep apnea syndrome, narcolepsy and idiopathic hypersomnia. ESS scores were significantly correlated with sleep latency measured during the multiple sleep latency test and during overnight polysomnography. In patients with obstructive sleep apnea syndrome ESS scores were significantly correlated with the respiratory disturbance index and the minimum SaO<sub>2</sub> recorded overnight. ESS scores of patients who simply snored did not differ from controls. **Key Words:** Sleepiness—Questionnaire—Sleep propensity—Insomnia—Obstructive sleep apnea syndrome.

---

A large proportion of adult patients who present to sleep disorder centers have disorders associated with excessive daytime sleepiness. These include obstructive sleep apnea syndrome (OSAS), periodic limb movement disorder (PLMD), narcolepsy, idiopathic hypersomnia and other miscellaneous disorders (1). The severity of their chronic daytime sleepiness is an important aspect of each patient's assessment. Thus, there is a great need for a simple standardized test for measuring a patient's general level of sleepiness, which is independent of short-term variations in sleepiness, with the time of day and from day to day.

The multiple sleep latency test (MSLT) is widely used and is generally believed to provide a valid measurement of sleepiness on the particular day of the test (2,3). It is based on the premise that the sleepier the subject, the quicker he will fall asleep when encouraged to do so while lying down in a nonstimulating environment. The MSLT has a reasonably high test-retest reliability over periods of months in normal subjects (4). Assuming the same reliability holds true for patients, the MSLT must be considered the standard method for measuring their chronic daytime sleepiness. However, the MSLT is very cumbersome, time-

consuming and expensive to perform. It takes all day, both for the subject and the polysomnographer and is not easy to justify as a routine test for all patients.

Other measures of sleepiness have been devised (5,6). In the maintenance of wakefulness test (MWT) the latency to sleep onset is measured with the subject sitting in a dimly lit, warm, quiet room, trying to stay awake rather than to fall asleep (5). However, all such tests share the disadvantage of the MSLT in being cumbersome and expensive. Similar criticisms can be levelled at tests of sleepiness based on pupillometry (7), or cerebral evoked potentials (8). Other assessments of sleepiness have involved prolonged psychomotor performance tests, the results of which are not related in any simple or consistent way to sleepiness in different subjects (9).

By contrast, the Stanford sleepiness scale (SSS) is a quick and simple test (10). It involves the subject's own reports of symptoms and feelings at a particular time. Visual analogue scales (VAS) of sleepiness/alertness have also been used in this context (11). However, these tests do not attempt to measure the general level of daytime sleepiness, as distinct from feelings of sleepiness at a particular time. Nor, it appears, is the subjective sleepiness that they measure the same as the objective sleepiness measured by the MSLT (3,7). Scores on the SSS or on a VAS of sleepiness are not significantly correlated with sleep latency in the MSLT,

---

Accepted for publication July 1991.

Address correspondence and reprint requests to Dr. Murray W. Johns, Sleep Disorders Unit, Epworth Hospital, Melbourne, Victoria 3121, Australia.

TABLE 1. *The Epworth sleepiness scale*

| THE EPWORTH SLEEPINESS SCALE                                                                                                                                                                                                                                                                                                                                            |                               |
|-------------------------------------------------------------------------------------------------------------------------------------------------------------------------------------------------------------------------------------------------------------------------------------------------------------------------------------------------------------------------|-------------------------------|
| Name:                                                                                                                                                                                                                                                                                                                                                                   | _____                         |
| Today's date:                                                                                                                                                                                                                                                                                                                                                           | _____ Your age (years): _____ |
| Your sex (male = M; female = F):                                                                                                                                                                                                                                                                                                                                        | _____                         |
| How likely are you to doze off or fall asleep in the following situations, in contrast to feeling just tired? This refers to your usual way of life in recent times. Even if you have not done some of these things recently try to work out how they would have affected you. Use the following scale to choose the <i>most appropriate number</i> for each situation: |                               |
| 0 = would <i>never</i> doze                                                                                                                                                                                                                                                                                                                                             |                               |
| 1 = <i>slight</i> chance of dozing                                                                                                                                                                                                                                                                                                                                      |                               |
| 2 = <i>moderate</i> change of dozing                                                                                                                                                                                                                                                                                                                                    |                               |
| 3 = <i>high</i> chance of dozing                                                                                                                                                                                                                                                                                                                                        |                               |
|                                                                                                                                                                                                                                                                                                                                                                         | Chance<br>of<br>dozing        |
| Sitting and reading                                                                                                                                                                                                                                                                                                                                                     | _____                         |
| Watching TV                                                                                                                                                                                                                                                                                                                                                             | _____                         |
| Sitting, inactive in a public place (e.g. a theater or a meeting)                                                                                                                                                                                                                                                                                                       | _____                         |
| As a passenger in a car for an hour without a break                                                                                                                                                                                                                                                                                                                     | _____                         |
| Lying down to rest in the afternoon when circumstances permit                                                                                                                                                                                                                                                                                                           | _____                         |
| Sitting and talking to someone                                                                                                                                                                                                                                                                                                                                          | _____                         |
| Sitting quietly after a lunch without alcohol                                                                                                                                                                                                                                                                                                                           | _____                         |
| In a car, while stopped for a few minutes in the traffic                                                                                                                                                                                                                                                                                                                | _____                         |
| Thank you for your cooperation                                                                                                                                                                                                                                                                                                                                          |                               |

even when measured at virtually the same time (12). These subjective reports may be related more to tiredness and fatigue than to sleep propensity, as manifested by the tendency to fall asleep.

The present report describes the development and use of a new questionnaire, the Epworth sleepiness scale (ESS), designed to measure sleep propensity in a simple, standardized way. The scale covers the whole range of sleep propensities, from the highest to the lowest.

### Development of the ESS

The concept of the ESS was derived from observations about the nature and occurrence of daytime sleep and sleepiness. Some people who suffer from excessive daytime sleepiness keep themselves busy and choose not to lie down nor to sit and relax during the day, thereby purposely avoiding daytime sleep. Others who may be bored, with spare time or who are socially withdrawn but who may not be very sleepy, choose to lie down and sleep during the day. About 50% of ostensibly healthy medical students usually sleep during the day at least once in an average week (13). Among 17–22-year-old recruits entering the French army, 19% reported sleeping during the day, regularly or occasionally. But only 5% complained of daytime sleepi-

ness (14). Thus, knowing how frequently or for how long subjects usually sleep during the day will probably not provide a useful measurement of their sleepiness.

By contrast, sleepy people often describe how they doze off inadvertently while engaged in activities that involve low levels of stimulation, relative immobility and relaxation, such as sitting and watching TV. Earlier questionnaire surveys have indicated which situations, commonly encountered in daily life, are the most soporific (15). A large survey among adults in New Mexico asked about their frequency of falling asleep in five situations (16). The authors derived a score from the three "most sleepy" questions, which referred to falling asleep while "inactive in a public place", "at work", and "in a moving vehicle as passenger or driver". MSLTs on 116 of these subjects showed a statistically significant correlation between their sleep latency (SL) and their answers to those three questions ( $r = -0.32$ ,  $p < 0.001$ ).

The ESS is based on questions referring to eight such situations, some known to be very soporific; others less so. The questionnaire, which is self-administered, is reproduced in Table 1. Subjects are asked to rate on a scale of 0–3 how likely they would be to doze off or fall asleep in the eight situations, based on their usual way of life in recent times. A distinction is made between dozing off and simply feeling tired. If a subject has not been in some of the situations recently, he is asked, nonetheless, to estimate how each might affect him.

The ESS tries to overcome the fact that people have different daily routines, some facilitating and others inhibiting daytime sleep. For example, the ESS does not ask how frequently the subject falls asleep while watching TV. That would depend on how frequently he watched TV as much as on his sleepiness. Instead, the subject rates the chances that he would doze off whenever he watches TV.

One question asks how likely the subject would be to doze off while lying down to rest in the afternoon when circumstances permit. It was felt that normal people probably would, and sleepy people certainly would tend to doze off in that situation. Never to do so would indicate an unusually low level of sleepiness, as described by some insomniacs. Some other situations were included in the questionnaire because it was believed that only the most sleepy people would doze in them—while sitting and talking to someone, and in a car while stopped for a few minutes in traffic. These suppositions proved correct.

The numbers selected for the eight situations in the ESS were added together to give a score for each subject, between 0 and 24. These ESS scores proved capable of distinguishing individuals and diagnostic groups over the whole range of daytime sleepiness.

TABLE 2. The groups of experimental subjects, their ages and ESS scores

| Subjects/diagnoses     | Total number of subjects (M/F) | Age in years (mean $\pm$ SD) | ESS scores (mean $\pm$ SD) | Range |
|------------------------|--------------------------------|------------------------------|----------------------------|-------|
| Normal controls        | 30 (14/16)                     | 36.4 $\pm$ 9.9               | 5.9 $\pm$ 2.2              | 2-10  |
| Primary snoring        | 32 (29/3)                      | 45.7 $\pm$ 10.7              | 6.5 $\pm$ 3.0              | 0-11  |
| OSAS                   | 55 (53/2)                      | 48.4 $\pm$ 10.7              | 11.7 $\pm$ 4.6             | 4-23  |
| Narcolepsy             | 13 (8/5)                       | 46.6 $\pm$ 12.0              | 17.5 $\pm$ 3.5             | 13-23 |
| Idiopathic hypersomnia | 14 (8/6)                       | 41.4 $\pm$ 14.0              | 17.9 $\pm$ 3.1             | 12-24 |
| Insomnia               | 18 (6/12)                      | 40.3 $\pm$ 14.6              | 2.2 $\pm$ 2.0              | 0-6   |
| PLMD                   | 18 (16/2)                      | 52.5 $\pm$ 10.3              | 9.2 $\pm$ 4.0              | 2-16  |

## METHODS

### Subjects

A total of 180 adult subjects completed the questionnaire. There were 30 controls who were mainly hospital employees, working during the day, who gave a history of normal sleep habits without snoring. There were 150 patients with various sleep disorders, whose ages, sex and diagnostic categories are shown in Table 2. Every new patient who presented to the Epworth Sleep Disorders Unit answered the ESS at their first consultation. After investigation, all patients with the diagnoses listed in Table 2 were included in the study until there were 150. The ages of patients ranged from 18 to 78 years. The mean age within diagnostic groups varied from 36 to 52 years. Men greatly outnumbered women in the snoring, OSAS and PLMD groups. The sexes were about equal in the other groups, apart from the insomniacs where women outnumbered men.

A total of 138 patients had overnight polysomnography, but another 12 who were clearly suffering from either chronic psychophysiological or idiopathic insomnia did not. The latter diagnoses were made on the basis of each patient's history, using the criteria set out in the International Classification of Sleep Disorders (1). Other insomniacs, with mood disorders or drug effects, were excluded.

Twenty-seven patients had MSLTs after overnight polysomnography. They had four naps, at 1000, 1200, 1400 and 1600 hours. Sleep latency was measured from the time lights were switched off until the onset of stage 1 sleep of at least 1 minute duration, or the onset of either stage 2 or rapid eye movement (REM) sleep. The early onset of REM sleep was indicated by the occurrence of REM sleep within 20 minutes of sleep onset. Of the 27 patients, 11 had narcolepsy diagnosed from the patient's history, particularly of cataplexy, associated with an SL of less than 10 minutes and the early onset of REM sleep in two or more naps (10 patients) or in one nap (1 patient with cataplexy). Fourteen of the 27 patients had idiopathic hypersomnia, diagnosed from their excessive daytime sleepiness in the absence of either cataplexy or the early onset of REM sleep in the MSLT. The remaining two patients

had excessive daytime sleepiness due to OSAS. The ESS scores for the 27 patients who had MSLTs ranged from 11 to 24.

All patients with primary snoring had presented initially because of the intensity and persistence of their snoring, on most nights at least. Many had been observed at home to pause in their breathing at night, suggesting that they may have had sleep apnea, but this was found not to be of clinical significance by polysomnography. The respiratory disturbance index (RDI) was calculated as the number of apneas and hypopneas causing a drop of  $>3\%$  in the arterial oxygen saturation per hour of sleep. The RDI for primary snorers was  $\leq 5$ . The 55 patients with OSAS were divided into three subcategories according to their RDI, regardless of their complaints about daytime sleepiness or insomnia (Table 3). The RDI for mild OSAS was within the range  $>5-15$ ; for moderate OSAS the range was  $>15-30$ , and for severe OSAS it was  $>30$ .

A diagnosis of PLMD was made only if there were at least 90 separate movements in one or both legs per night. The mean periodic movement index for these subjects, calculated as the number of movement events per hour of sleep, was  $43.6 \pm 30.4$  (SD). Patients who had both PLMD and OSAS were excluded from this study. However, 9 of the 18 subjects with PLMD snored during polysomnography without having OSAS.

### Statistical methods

The ESS scores of male and female control subjects were compared by a Student's *t* test. Differences in ESS scores between the diagnostic groups were tested by one-way ANOVA and then by posthoc Scheffé tests. A separate ANOVA and posthoc Scheffé tests were

TABLE 3. ESS scores in mild, moderate and severe OSAS

|               | Mean RDI $\pm$ SD | Total number of subjects (M/F) | ESS scores (mean $\pm$ SD) | Range |
|---------------|-------------------|--------------------------------|----------------------------|-------|
| Mild OSAS     | 8.8 $\pm$ 2.3     | 22 (21/1)                      | 9.5 $\pm$ 3.3              | 4-16  |
| Moderate OSAS | 21.1 $\pm$ 4.0    | 20 (20/0)                      | 11.5 $\pm$ 4.2             | 5-20  |
| Severe OSAS   | 49.5 $\pm$ 9.6    | 13 (12/1)                      | 16.0 $\pm$ 4.4             | 8-23  |

used to test the differences in ESS scores between primary snorers and the three categories of OSAS. The Scheffé test is conservative and is suitable for groups with unequal numbers of subjects (17). The distribution of sleep latencies, measured in minutes, was highly skewed positively and was normalized by  $\log_e$  transformation. The relationships between pairs of continuous variables, such as RDI and sleep latency during overnight polysomnography, were tested by Pearson correlation coefficients and linear regression. Statistical significance was accepted at  $p < 0.05$  in two-tailed tests.

## RESULTS

The mean ESS score for control subjects was  $5.9 \pm 2.2$  (SD) and their modal score was 6. There was no significant difference in the scores between male and female controls (males =  $5.64 \pm 2.56$ ; females =  $6.06 \pm 1.84$ ,  $t = 0.520$ ,  $p = 0.607$ ). Consequently, no distinction was made between the sexes in other groups.

Patients suffering from disorders known to be associated with excessive daytime sleepiness reported the likelihood of dozing under circumstances that were not conducive to sleep in normal subjects. For example, 96% of the patients with either narcolepsy or idiopathic hypersomnia reported some chance, and often a high chance, of dozing while sitting and talking to someone, or in a car while stopped for a few minutes in the traffic. Only 6% of controls reported a slight chance of doing so.

Patients with persistent psychophysiological or idiopathic insomnia reported either a complete inability or only a slight chance of dozing while lying down to rest in the afternoon when circumstances permitted. By contrast, 94% of controls reported some likelihood of dozing then.

One-way ANOVA demonstrated significant differences in ESS scores between the seven diagnostic groups in Table 2 ( $F = 50.00$ ;  $df = 6, 173$ ;  $p < 0.0001$ ). Posthoc tests between paired groups showed that the ESS scores for primary snorers did not differ from controls ( $p = 0.998$ ). Scores for OSAS, narcolepsy and idiopathic hypersomnia were significantly higher than for controls ( $p < 0.001$ ) or primary snorers ( $p < 0.001$ ). The insomniacs had significantly lower scores ( $p < 0.01$ ) than all groups other than controls, for which the difference did not quite reach statistical significance ( $p = 0.063$ ). The ESS scores of patients with PLMD did not differ significantly from controls ( $p = 0.149$ ).

A separate one-way ANOVA for the ESS scores of primary snorers and the three subcategories of OSAS showed significant differences between these groups ( $F = 23.11$ ;  $df = 3, 82$ ;  $p < 0.001$ ). Posthoc tests then showed that ESS scores for each level of OSAS were

significantly higher than for primary snorers ( $p = 0.035$  for mild OSAS;  $p < 0.001$  for moderate and severe OSAS). Scores for severe OSAS were higher than for moderate OSAS ( $p < 0.001$ ), but the difference between mild and moderate OSAS did not reach statistical significance ( $p = 0.085$ ).

Considering all 55 patients with OSAS together, there was a significant correlation, on the one hand, between ESS scores and RDI ( $r = 0.550$ ,  $p < 0.001$ ) and on the other hand, between ESS scores and the minimum  $\text{SaO}_2$  recorded during apneas overnight ( $r = -0.457$ ,  $p < 0.001$ ). The RDI and the minimum overnight  $\text{SaO}_2$  during apneas were also significantly correlated ( $r = -0.687$ ,  $p < 0.001$ ). The linear regression equations for these three relationships, in the form  $Y = a + bx$ , were as follows:

$$\begin{aligned}(\text{RDI}) &= -0.674 + 2.006(\text{ESS score}) \\(\text{minimum SaO}_2\%) &= 86.47 - 1.055(\text{ESS score}) \\(\text{minimum SaO}_2\%) &= 84.15 - 0.440(\text{RDI})\end{aligned}$$

Among the 138 patients who had overnight polysomnography there was a significant correlation between ESS score and (ln) sleep latency at night ( $r = -0.379$ ,  $n = 138$ ,  $p < 0.001$ ). In the smaller group of patients who had MSLTs, the correlation between ln (SL) during the day and ESS score was also statistically significant ( $r = -0.514$ ,  $n = 27$ ,  $p < 0.01$ ). The linear regression equation for this relationship was  $\ln(\text{SL}) = 3.353 - 0.091(\text{ESS score})$ .

Individual ESS scores of 16 or more, indicating a high level of daytime sleepiness, were found only in patients with narcolepsy, idiopathic hypersomnia or OSAS of at least moderate severity (i.e.  $\text{RDI} > 15$ ). All patients with either narcolepsy or idiopathic hypersomnia had higher ESS scores than the controls (i.e.  $\text{ESS} > 10$ ) as did 12 of 13 patients with severe OSAS. The remaining patient in the latter category had an ESS score of 8 and was clinically not much affected by his sleep apnea.

Within the group of patients with PLMD, the periodic movement index, which ranged from 16 to 122 movements per hours of sleep, was not significantly correlated with ESS scores ( $r = 0.049$ ,  $n = 18$ ,  $p > 0.1$ ).

## DISCUSSION

These results provide evidence that a questionnaire-based scale as brief and as simple as the ESS can give valid measurements of sleep propensity in adults. ESS scores significantly distinguished groups of patients who are known from other investigations to have differences in their levels of sleepiness, as measured by the MSLT (2,18). ESS scores were significantly correlated

with sleep latency measured during the day with MSLTs and at night with polysomnography. This is despite any effect of the first night in the laboratory. Others have found a significant positive correlation between the SL at night and during the day in the same subject (19).

ESS scores greater than 16, indicative of a high level of daytime sleepiness, were encountered only in patients with moderate or severe OSAS (RDI > 15), narcolepsy or idiopathic hypersomnia. These disorders are known to be associated with excessive daytime sleepiness as measured by the MSLT (2,18). Nevertheless, high ESS scores, by themselves, are not diagnostic of a particular sleep disorder, any more than is an SL of 5 minutes in an MSLT.

ESS scores were correlated with both the RDI and the minimum SaO<sub>2</sub> recorded during polysomnography in patients with OSAS of differing severity. In the past, these measures of the severity of OSAS have been found to be related to the SL in MSLTs in some, but not in all investigations (18,20). The finding that ESS scores can distinguish patients who simply snore from those with even mild OSAS is evidence for the sensitivity of the ESS. The questionnaire should be useful in elucidating the epidemiology of snoring and OSAS, and any associated cardiovascular or cerebrovascular risks. Previous investigations of this kind have tended to blur the distinction between primary snoring and OSAS (21).

In the patients with PLMD, the finding of an almost zero correlation between their periodic movement index and ESS scores suggests that whatever level of daytime sleepiness is associated with PLMD, it is not related simply to the frequency of limb movements. It may be more closely related to the frequency of those movements producing arousal rather than those that do not. This distinction was not made here and further investigation is required to clarify this relationship.

The low ESS scores of patients with idiopathic or psychophysiological insomnia are consistent with evidence that such patients have a low sleep propensity, even when they are able to relax (22). It must not be assumed, however, that this is necessarily so for other kinds of insomnia, such as with mood disorders.

The relatively wide range of ESS scores in the control subjects [2-10] is consistent with evidence that some healthy adults, without recognizable sleep disorders, remain sleepier than others during the day (23). Such differences persist in MSLTs, even after extending the hours of nocturnal sleep to overcome possible sleep deprivation (24). The sleep propensity of a subject on a particular day would be influenced by the quality and duration of prior sleep or of sleep deprivation, the time of day, the presence of various sleep disorders, drug effects, the level of interest and motivation induced by

the situation at hand, as well as longer-term physiological differences. The ESS does not distinguish the nature of long-term physiological or pathological processes that produce a particular level of sleep propensity. Other investigations, including overnight polysomnography, are required for that.

The ESS assumes that subjects can remember whether or not and under what circumstances they have dozed off during the day as part of their "usual way of life in recent times". The present results suggest that most patients can give meaningful self reports about this aspect of their behavior and that their ESS scores provide a measurement of their general level of daytime sleepiness, from low to very high levels. This has not been achieved previously by any other published questionnaire.

**Acknowledgement:** Irene Lehel assisted with the administration of questionnaires to the control subjects.

1. American Sleep Disorders Association. *The international classification of sleep disorders*. Rochester, MN, 1990.
2. Richardson G, Carskadon M, Flagg W, Van Den Hoed J, Dement W, Mitler M. Excessive daytime sleepiness in man: multiple sleep latency measurements in narcoleptic vs. control subjects. *Electroencephalogr Clin Neurophysiol* 1978;45:621-7.
3. Carskadon MA, Dement WC. The multiple sleep latency test: what does it measure? *Sleep* 1985;5:S67-72.
4. Zwyghuizen-Doorenbos A, Roehrs T, Schaeffer M, Roth T. Test-retest reliability of the MSLT. *Sleep* 1988;11:562-5.
5. Mitler M, Gujavarty KS, Browman CP. Maintenance of wakefulness test: a polysomnographic technique for evaluating treatment in patients with excessive somnolence. *Electroencephalogr Clin Neurophysiol* 1982;153:658-61.
6. Erman MK, Beckham B, Gardner DA, Roffwarg HP. The modified assessment of sleepiness test (MAST). *Sleep Res* 1987;16:550.
7. Pressman MR, Fry JM. Relationship of autonomic nervous system activity to daytime sleepiness and prior sleep. *Sleep* 1989;12:239-45.
8. Broughton R, Aguirre M, Dunham W. A comparison of multiple and single sleep latency and cerebral evoked potential (P300) measures in the assessment of excessive daytime sleepiness in narcolepsy-cataplexy. *Sleep* 1988;11:537-45.
9. Johnson LC, Spinweber CL, Gomez SA, Matteson LT. Daytime sleepiness, performance, mood, nocturnal sleep: the effect of benzodiazepine and caffeine on their relationship. *Sleep* 1990;13:121-35.
10. Hoddes E, Zarcone V, Smythe H, Phillips R, Dement WC. Quantification of sleepiness: a new approach. *Psychophysiology* 1973;10:431-6.
11. Herbert M, Johns MW, Doré C. Factor analysis of analogue scales measuring subjective feelings before and after sleep. *Br J Med Psychol* 1976;49:373-9.
12. Cook Y, Schmitt F, Berry D, Gilmore R, Phillips B, Lamb D. The effects of nocturnal sleep, sleep disordered breathing and periodic movements of sleep on the objective and subjective assessment of daytime somnolence in healthy aged adults. *Sleep Res* 1988;17:95.
13. Johns MW, Gay TJA, Goodyear MDE, Masterton JP. Sleep habits of healthy young adults: use of a sleep questionnaire. *Br J Prev Soc Med* 1971;25:236-41.
14. Billiard M, Alperovitch A, Perot C, Jammes A. Excessive daytime somnolence in young men: prevalence and contributing factors. *Sleep* 1987;10:297-305.
15. Roth T, Roehrs T, Carskadon M, Dement W. Daytime sleepiness and alertness. In: Kryger MH, Roth T, Dement WC, eds.

- Principles and practice of sleep medicine.* Philadelphia: Saunders, 1989:14-23.
16. Schmidt-Nowara WW, Wiggins CL, Walsh JK, Bauer C. Prevalence of sleepiness in an adult population. *Sleep Res* 1989;18:302.
  17. Munro BH, Visintainer MA, Page EB. *Statistical methods for health care research.* Philadelphia: J. B. Lippincott Co., 1986.
  18. Roehrs T, Zorick F, Wittig R, Conway W, Roth T. Predictors of objective level of daytime sleepiness in patients with sleep-related breathing disorders. *Chest* 1989;95:1202-6.
  19. Kaplan J, Fredrickson PA, Renaux SR. Nighttime sleep latency as an indicator of daytime sleepiness. *Sleep Res* 1990;19:241.
  20. Guilleminault C, Partinen M, Quera-Salva MA, Hayes B, Dement WC, Nino-Murcia G. Determinants of daytime sleepiness in obstructive sleep apnea. *Chest* 1988;94:32-7.
  21. Waller PC, Bhopal RS. Is snoring a cause of vascular disease: an epidemiological review. *Lancet* 1989;1:143-6.
  22. Stepanski E, Zorick F, Roehrs T, Young D, Roth R. Daytime alertness in patients with chronic insomnia compared with asymptomatic control subjects. *Sleep* 1988;11:54-60.
  23. Lavie P, Segal S. Twenty-four-hour structure of sleepiness in morning and evening persons investigated by ultrashort sleep-wake cycle. *Sleep* 1989;12:522-8.
  24. Roehrs T, Timms V, Zwyghuizen-Doorenbos A, Roth T. Sleep extension in sleepy and alert normals. *Sleep* 1989;12:449-57.

## Reliability and Factor Analysis of the Epworth Sleepiness Scale

Murray W. Johns

*Sleep Disorders Unit, Epworth Hospital, Melbourne, Victoria, Australia*

---

**Summary:** The Epworth Sleepiness Scale (ESS) is a self-administered eight-item questionnaire that has been proposed as a simple method for measuring daytime sleepiness in adults. This investigation was concerned with the reliability and internal consistency of the ESS. When 87 healthy medical students were tested and retested 5 months later, their paired ESS scores did not change significantly and were highly correlated ( $r = 0.82$ ). By contrast, ESS scores that were initially high in 54 patients suffering from obstructive sleep apnea syndrome returned to more normal levels, as expected, after 3-9 months' treatment with nasal continuous positive airway pressure. The questionnaire had a high level of internal consistency as measured by Cronbach's alpha (0.88). Factor analysis of item scores showed that the ESS had only one factor for 104 medical students and for 150 patients with various sleep disorders. The ESS is a simple and reliable method for measuring persistent daytime sleepiness in adults. **Key Words:** Sleepiness—Epworth—Questionnaire—Factor analysis—Reliability.

---

In the assessment of sleep habits and sleep disorders, a subject's general level of sleepiness during the day is an important characteristic that should be measured routinely. The Multiple Sleep Latency Test (MSLT) is widely used to measure daytime sleepiness, in the sense of the propensity to fall asleep when encouraged to do so in a nonstimulating environment (1). However, the time-consuming nature and expense of the MSLT are such that, all too often, such tests have not been done. There is great need for a simpler alternative.

Some earlier attempts to quantify daytime sleepiness on the basis of the subject's responses to one or more questions succeeded to some extent (2,3). However, each attempt involved different questions for which normative data have seldom been available. The lack of standardization has prevented comparisons being made between different studies. By contrast, other investigations have failed to distinguish different levels of daytime sleepiness on the basis of subjective reports (4-6). One can but speculate about the reasons for this failure, but the methods were not validated and the questions asked or the grading of responses cannot have been appropriate. The Stanford Sleepiness Scale (SSS) measures feelings of sleepiness or, perhaps more accurately, of tiredness at a particular time (7). How-

ever, the SSS has been found to be quite unsatisfactory when assessing sleep propensity as measured by the MSLT (8,9). A Sleep-Wake Activity Inventory (SWAI) has recently been developed with 35 items (10). Subjects respond to each item by marking a visual analogue scale at an appropriate position along its 10-cm length. In a factor analysis of item scores there were two factors, one of which was related to daytime sleepiness as measured by the MSLT, the other to "psychological distress". This supports the contention that appropriate questions in a standardized questionnaire can provide clinically useful measurements of a subject's general level of daytime sleepiness.

The Epworth Sleepiness Scale (ESS) has been proposed specifically for that purpose, as a simple method for measuring the general level of daytime sleepiness or sleep propensity in adults (11). The ESS is a brief, self-administered questionnaire that asks the subject to rate on a scale of 0-3 the chances that, over "recent times", he would have dozed in eight specific situations that are commonly met in daily life (0 = would never doze; 3 = high chance of dozing). Thus, the subject is asked to characterize, retrospectively, part of his usual behavior in a variety of situations that are more or less soporific. Subjects are asked to distinguish dozing behavior from feelings of tiredness. The ESS score is the sum of eight item-scores and can range from 0 to 24.

Evidence about the validity of ESS measurements has been reported previously (11). In patients with various sleep disorders ESS scores were correlated sig-

---

Accepted for publication April 1992.

Address correspondence and reprint requests to Murray W. Johns, Sleep Disorders Unit, Epworth Hospital, Melbourne, Victoria 3121, Australia.



nificantly with mean sleep latencies measured in MSLTs ( $r = -0.514$ ,  $n = 27$ ,  $p < 0.01$ ).

Scores on the ESS significantly distinguished control subjects from several groups of patients with sleep disorders that are known to be associated with different levels of daytime sleepiness. In patients with obstructive sleep apnea syndrome (OSAS) ESS scores were related to the severity of that disorder as measured by the respiratory disturbance index and by the minimum arterial oxygen saturation measured overnight during apneas. Patients with chronic psychophysiological or idiopathic insomnia tend to have very low ESS scores, indicative of a low sleep propensity.

The present investigation was concerned, first, with the test-retest reliability of ESS scores and, second, with the internal structure and consistency of the questionnaire. Healthy medical students are shown here to have a wide range of ESS scores that did not change significantly over a 5-month period. By contrast, the high ESS scores indicative of excessive daytime sleepiness in patients with OSAS are shown to return to more normal levels, as expected, after a few months' treatment with nasal continuous positive airway pressure (CPAP). The internal consistency of the ESS questionnaire is demonstrated by item analysis in two different groups of subjects—medical students and patients with a variety of sleep disorders. Factor analysis of ESS item scores, performed separately in these same two groups of subjects, shows that the questionnaire measures only one main variable.

These results, in addition to those reported earlier (11), provide evidence that the ESS is a simple and reliable method for measuring the general level of daytime sleepiness in adults.

## METHODS

Details of the ESS questionnaire have been published previously (11).

### Subjects

All 104 third-year medical students who had assembled for a teaching session at Monash University Medical School, Melbourne, answered the ESS at the same time, without discussion. Their mean age was  $20.9 \pm 2.8$  (SD) years. There were 55 men and 49 women, all of whom were ostensibly healthy although no attempt was made to investigate their general health or sleep habits in detail. The sleep habits of similar medical students at Monash University have been described previously using a sleep questionnaire (12). The mean duration of sleep on week nights was  $7.7 \pm 0.7$  (SD) hours, increasing to  $8.4 \pm 1.2$  (SD) hours on weekends,

figures that do not suggest chronic sleep deprivation, at least for the majority of such students. Apart from sleeping about half an hour less per day by waking earlier in the morning in summer than in winter, most aspects of the sleep habits of such students do not change significantly over a year (12).

During the academic year in question these students were not involved with night calls. Their daytime sleepiness was not measured by means other than the ESS. It was assumed that although the daytime sleepiness of a few may increase or decrease over a period of months because of changes in their sleep habits, the sleepiness of most, and of the group as a whole, would remain constant, as others have found using MSLTs (13).

The students in the present investigation first answered the ESS at the beginning of May 1991, 2 months after the start of their academic year. The same class of students was asked, without warning, to answer the ESS a second time at the end of September, 5 months after their first response and 2 months after their winter vacation. Eighty-seven students were identified as having completed the questionnaire on both occasions. The ESS scores of these 87 did not differ significantly from those of the whole group of 104. The 87 paired ESS scores were used to assess the test-retest reliability of the questionnaire.

Over a 9-month period in the Sleep Disorders Unit at Epworth Hospital there were 54 patients with OSAS who were treated successfully with nasal CPAP for at least 3 months and who had answered the ESS before and after treatment. Their mean age was  $53.1 \pm 11.0$  (SD) years with a range from 28 to 78 years. Their respiratory disturbance index (RDI) was defined as the number of apneas and hypopneas causing a fall in arterial oxygen saturation of at least 3% per hour of sleep. Apneas involved cessation of nasal and oral airflow, and hypopneas at least a 50% reduction in airflow for 10 seconds or more. The polysomnographic methods have been described previously (14). The mean RDI before treatment was  $27.1 \pm 15.5$  (SD) (range 4–56). The minimum arterial oxygen saturation recorded for each patient during apneas overnight (before treatment) had a mean of  $73 \pm 10.5\%$  (SD) (range 50–92%).

The optimum nasal CPAP pressure required to control snoring and apneas and to maintain the  $\text{SaO}_2$  at  $\geq 90\%$  was determined for each patient during a second night's polysomnography. That pressure was then fixed in a CPAP pump that was used each night at home. Only patients who reported compliance with this treatment were included here.

The ESS scores of 150 consecutive patients with various sleep disorders have been reported previously (11). Their diagnoses included OSAS, primary snoring, narcolepsy, idiopathic hypersomnia, periodic limb

movement disorder and idiopathic or psychophysiological insomnia. Ages ranged from 18 to 78 years. Half of the patients with OSAS who are treated by nasal CPAP, as above, had their pretreatment ESS scores included in this group, which was finalized before the CPAP treatment group. These 150 patients' scores on each item of the ESS were submitted to factor analysis. A similar analysis was performed separately on the item scores of the 104 medical students.

### Statistical methods

All statistical analysis was done on a personal computer using the commercially available package of programs called Statistica® (Statsoft Inc., Tulsa, OK). The tests included Student's *t* tests for dependent or independent samples, Pearson correlation coefficients and the measurement of skewness and kurtosis of an approximately normal distribution of ESS scores. Differences between the frequency distributions of item scores were tested by  $\chi^2$  tests (df = 3: no Yates correction). Statistical significance was accepted at  $p < 0.05$  in two-tailed tests. The program "Reliability" was used for item analysis and the calculation of Cronbach's statistic, alpha, which gives a measure of the internal consistency of the questionnaire (15). Factor analysis of ESS item-scores was performed by the program "Factor". Communalities were calculated by multiple regression rather than being estimated from variances. As is usual, only factors with eigenvalues  $> 1.0$  were retained. Varimax or other rotation was not appropriate because there was only one main factor in each of the two separate factor analyses.

It is feasible to perform factor analysis on ordinal (ranked) data such as ESS item-scores that can only be 0, 1, 2 or 3 (16). However, such analysis assumes that the variables are normally distributed. In fact, the distribution of item-scores was significantly different from normal for all items except item 5 for the patients and all except items 5, 6 and 8 for the students ( $p < 0.001$ , tested by separate  $\chi^2$  tests, df = 3). It was not feasible to normalize the data separately for each item, and it was accepted that there may be some limitation in the accuracy of calculations as a result. If this were a practical problem it would presumably become apparent in the comparison of results from the two populations in which item-scores were distributed quite differently (see below).

## RESULTS

### ESS scores of medical students

The mean ESS score for the whole group of 104 medical students was  $7.6 \pm 3.9$  (SD). The range was

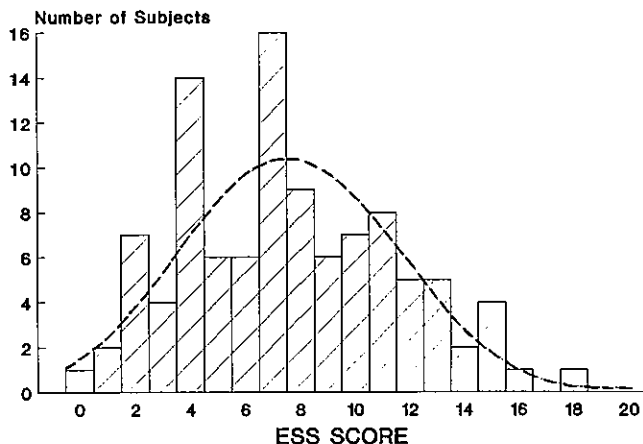

FIG. 1. The distribution of ESS scores from 104 medical students and the normal distribution (dotted).

0–18 and the modal score was 7 (Fig. 1). The distribution was approximately normal, but with a skewness of 0.32 and kurtosis of  $-0.53$ . These scores were slightly higher than those of 30 normal control subjects in a previous investigation in whom the mean ESS score was  $5.9 \pm 2.2$  (SD), the modal score was 6 and the range was 2–10 (2). The difference was statistically significant ( $t = 2.37$ , df = 132,  $p < 0.02$ ).

### Test-retest reliability

Comparisons between the ESS responses of 87 students on two separate occasions, 5 months apart, enabled an estimate to be made of the test-retest reliability of the questionnaire. On the first occasion their mean ESS score was  $7.4 \pm 3.9$  (SD) and on the second occasion was  $7.6 \pm 3.8$  (SD). The mean difference between these paired scores was  $0.20 \pm 2.3$  (SD), which was not statistically significant ( $t = 0.79$ , df = 86,  $p = 0.43$ ). The paired scores differed by no more than 1 in 51.7% of students, by no more than 2 in 81.6% and by no more than 4 in 96.6%. The Pearson correlation coefficient between the 87 paired scores was 0.822 ( $p < 0.001$ ).

By contrast, the 54 patients with OSAS who were treated by nasal CPAP had ESS scores of  $14.3 \pm 3.6$  (SD) with a range of 5–21 before treatment and  $7.4 \pm 4.1$  (SD) with a range of 0–16 after treatment. The mean difference between these paired scores was  $7.0 \pm 5.2$  (SD), which was statistically significant ( $t = -9.59$ , df = 53,  $p < 0.001$ ).

Thus, ESS scores did not change significantly over several months under circumstances when daytime sleepiness was expected to remain constant but did change significantly as expected, after CPAP treatment for OSAS. These results indicate a reasonably high level of reliability for ESS scores.

**TABLE 1.** The ESS item scores of (a) 40 sleepy patients and (b) 104 medical students and the significance of differences between those two groups for each item ( $\chi^2$  tests, 3 df)

| Item no. | Situation                                                     | Group | No. of subjects with item scores of |    |    |    | (p)    |
|----------|---------------------------------------------------------------|-------|-------------------------------------|----|----|----|--------|
|          |                                                               |       | 0                                   | 1  | 2  | 3  |        |
| 1        | Sitting and reading                                           | (a)   | 0                                   | 5  | 10 | 25 | <0.001 |
|          |                                                               | (b)   | 31                                  | 38 | 29 | 6  |        |
| 2        | Watching TV                                                   | (a)   | 0                                   | 5  | 7  | 28 | <0.001 |
|          |                                                               | (b)   | 41                                  | 46 | 12 | 5  |        |
| 3        | Sitting, inactive in a public place                           | (a)   | 1                                   | 8  | 19 | 12 | =0.001 |
|          |                                                               | (b)   | 40                                  | 38 | 18 | 8  |        |
| 4        | As a passenger in a car for an hour without a break           | (a)   | 2                                   | 7  | 11 | 20 | <0.001 |
|          |                                                               | (b)   | 30                                  | 37 | 16 | 21 |        |
| 5        | Lying down to rest in the afternoon when circumstances permit | (a)   | 0                                   | 0  | 4  | 36 | <0.001 |
|          |                                                               | (b)   | 3                                   | 19 | 24 | 58 |        |
| 6        | Sitting and talking to someone                                | (a)   | 8                                   | 18 | 10 | 4  | <0.001 |
|          |                                                               | (b)   | 99                                  | 4  | 0  | 1  |        |
| 7        | Sitting quietly after a lunch without alcohol                 | (a)   | 0                                   | 10 | 12 | 18 | <0.001 |
|          |                                                               | (b)   | 38                                  | 38 | 20 | 8  |        |
| 8        | In a car, while stopped for a few minutes in the traffic      | (a)   | 9                                   | 16 | 6  | 9  | <0.001 |
|          |                                                               | (b)   | 93                                  | 9  | 1  | 1  |        |

### Item analysis

Cronbach's statistic, alpha, was used as a measure of the internal consistency of the items in the questionnaire. This analysis was performed on item-scores from two separate groups of subjects—150 patients with various sleep disorders and 104 medical students. Alpha was 0.88 for the patients and 0.73 for the students. In neither group did the value of alpha increase after deleting any one of the items from the questionnaire. These results indicate a reasonably high level of consistency between the eight items of the ESS.

The eight situations described in the ESS are not all of the same soporific nature. Indeed, they were chosen on a priori grounds to be different. This is illustrated by comparing the item-scores of subjects in two different groups (Table 1). The first group was of 40 patients, described here as sleepy because they were all those with narcolepsy, idiopathic hypersomnia or severe OSAS (RDI > 30), selected from the group of 150 patients described previously (11). The mean ESS score for these 40 patients was  $17.2 \pm 3.7$  (SD); much higher than for the 104 medical students ( $7.6 \pm 3.9$ ). These two groups also differed significantly in their item-scores for each item (Table 1). In all eight situ-

ations the 40 sleepy patients were much more likely than the students to doze. In both groups the situation in item 5 (lying down to rest in the afternoon when circumstances permit) was the most soporific. Every one of the 40 sleepy patients reported at least a moderate chance of dozing off then, of which 90% reported a high chance of doing so. However, more than three-quarters of the students also reported a moderate or a high chance of dozing in that situation. By contrast, the situation in items 6 and 8 (sitting and talking to someone, or in a car, while stopped for a few minutes in the traffic) were the least soporific for both groups. Thirty-five percent of the sleepy patients, compared with only 1% of students, reported at least a moderate chance of dozing when sitting and talking to someone. The other situations in items 1–4 and 7 were intermediate in their soporific nature for both groups.

### Factor analysis

Factor analysis was performed on the ESS item-scores of the 150 patients and the 104 students separately. This showed that there was only one main factor in each group (Table 2). The eigenvalue was 3.95 for the patients and 2.07 for the students. The normalized factor loadings were relatively high on all items for the patients, and on all but items 6 and 8 for the students. There were so few students dozing in those two situations (Table 1) that there was very little variance associated with those item-scores.

**TABLE 2.** The normalized factor loadings for items of the ESS reported by 150 patients and 104 students

| ESS item no. | Normalized factor loadings |          |
|--------------|----------------------------|----------|
|              | Patients                   | Students |
| 1            | 0.73                       | 0.55     |
| 2            | 0.59                       | 0.49     |
| 3            | 0.77                       | 0.62     |
| 4            | 0.68                       | 0.54     |
| 5            | 0.53                       | 0.49     |
| 6            | 0.73                       | 0.25     |
| 7            | 0.76                       | 0.64     |
| 8            | 0.73                       | 0.37     |

## DISCUSSION

The results indicate, first, that the ESS questionnaire is reasonably reliable in the test-retest sense and, second, that it has a high level of internal consistency,

assessed by item analysis and factor analysis within two different groups of subjects.

ESS scores did not change significantly and were highly correlated when tested and retested 5 months later in students whose daytime sleepiness was expected to remain constant. By contrast, the high ESS scores of patients with OSAS, indicative of the excessive daytime sleepiness, which is a clinical feature of that disorder, were reduced to more normal scores, as expected, after 3 or more months' treatment with nasal CPAP.

The internal consistency of the ESS, measured by Cronbach's alpha, was high for the patients with a variety of sleep disorders (0.88) and a little lower, although still satisfactory (0.73), for the students. This consistency was not increased by deleting any of the items from either group. Factor analysis of item-scores showed that the ESS measured only one main variable within each group. Thus, the results support the use of the ESS as a sum-scale for which the derived measurement, the total ESS score, is simply the sum of eight item-scores. Scoring the results is therefore very quick and simple.

The ESS was designed to measure daytime sleepiness over the whole range, from very high to low levels. The items were chosen, therefore, to represent situations of a widely differing soporific nature. The results show that the relative soporific nature of those situations is about the same for very sleepy patients as it is for normal subjects. However, sleepy subjects doze more frequently and in more of those situations than do normal subjects.

Despite the similarities in the results from the patients and the students there were also minor differences. Cronbach's alpha and the normalized factor loadings indicated a level of internal consistency in responses to the ESS that was lower for the students than for patients. The reasons for this are not clear but may involve the nonnormal distribution of some item-scores or the fact that the range of ESS scores was higher among the patients (0-24) than the students (0-18).

The findings that ESS scores of the medical students were higher than those of healthy control subjects reported in a previous investigation (11) highlights some difficulties in establishing normal values. The control group in the previous investigation had only 30 subjects, all of whom were older than the present students. However, it may be that normal adults in their early 20s are sleepier, on average, than normal middle-aged adults, as their ESS scores suggest. There is corroborative evidence for this in MSLTs reported by others (17).

Nasal CPAP treatment for several months reduced the ESS scores of patients with OSAS to the same levels as those of the medical students, but still slightly higher

than those of middle-aged, nonsnoring controls from the previous investigation, with whom comparison may be more appropriate. This difference did not quite reach statistical significance ( $t = 1.89$ ,  $df = 82$ ,  $p = 0.06$ ). However, the daytime sleepiness of patients with OSAS, even after successful treatment with nasal CPAP, may remain slightly above normal, as indicated also by the results of Di Phillipio et al. (18) who used MSLTs to measure sleepiness under similar circumstances.

There was a wide range of ESS scores among the students and the patients here, as there had been within each diagnostic group of patients and the controls in the earlier investigation (11). At each end of the clinically normal range, particularly with scores greater than 9, there is a considerable overlap with scores that are abnormal in the sense that they are associated with sleep disorders that are known to affect daytime sleepiness. This overlap between normal and abnormal occurs also with daytime sleepiness measured by MSLTs. Some healthy adults fall asleep in less than 5 minutes, which is considered to represent pathological sleepiness in others (19).

When the ESS was developed it was intended that it should measure only that component of daytime sleepiness which persists from week to week and longer in a given subject, independent of changes with the time of day and from day to day. This is what the MSLT and its variants such as the Maintenance of Wakefulness Test (20) are believed to measure when the mean SL is determined from four to six naps on one day, so overcoming much of the time-of-day effect, and attempts have been made to normalize the preceding night's sleep and to remove the effects of drugs that would otherwise influence the results. This longer-term or persistent component of daytime sleepiness may be influenced by several factors such as a psychophysiological trait involving inherently different levels of sleep propensity in difficult subjects or the presence of one or more chronic sleep disorders such as obstructive sleep apnea, narcolepsy or periodic limb movement disorder. It was believed that this general level of daytime sleepiness would, over a period of time, become incorporated into each subject's way of life, modifying his chances of either dozing or staying awake when in various nonstimulating situations. It was assumed also that most adults would be able to report whether or not they dozed in those situations. The initial results with the ESS suggest that those suppositions were correct (11).

The ESS questionnaire is now shown to be reliable, to be internally consistent and to have only one main dimension in its variance. It is conceptually unique in measuring the whole range of sleep propensities, from very high to very low. It is simple and self-administered, taking a few minutes to complete and a few

seconds to score. With mounting evidence about its validity, it promises to provide a much-needed, simple, standardized method for measuring daytime sleepiness in adults. Nevertheless, the ESS cannot perform all the functions of the MSLT such as measuring changes in sleepiness from day to day or indicating the early onset of REM sleep, which is so important in the diagnosis of narcolepsy.

## REFERENCES

- Richardson G, Carskadon M, Flagg W, Van Dan Hoed J, Dement W, Mitler M. Excessive daytime sleepiness in man: multiple sleep latency measurements in narcoleptics vs. control subjects. *Electroencephalogr Clin Neurophysiol* 1978;45:621-7.
- Sink J, Bliwise DL, Dement WC. Self-reported daytime somnolence and impaired respiration in sleep. *Chest* 1986;90(2):177-80.
- Schmidt-Nowara WW, Wiggins CL, Walsh JK, Bauer C. Prevalence of sleepiness in an adult population. *Sleep Res* 1989;18:302.
- Regestein QR, Ferber R, Johnson TS, Murawsk B, Strome M. Subjective sleepiness and vigilance in obstructive sleep apnea. *Sleep Res* 1987;16:414.
- Crocker ID, Olson LG, Saunders NA, Hensley MJ, McKeon JL, Allen KM, Gyulay SG. Estimation of the probability of disturbed breathing during sleep before a sleep study. *Am Rev Respir Dis* 1990;142:14-8.
- Jennum P, Sjol, A, Suadiciani P. Predictive symptoms for snoring and obstructive sleep apnea. *Sleep Res* 1991;20A:329.
- Hoddes E, Zarcone V, Smythe H, Phillips R, Dement WC. Quantification of sleepiness: a new approach. *Psychophysiology* 1973;10:431-6.
- Pressman MR, Fry JM. Relationship of autonomic nervous system activity to daytime sleepiness and prior sleep. *Sleep* 1989;12:239-45.
- Cook Y, Schmitt F, Berry D, Gilmore R, Phillips B, Lamb D. The effects of nocturnal sleep, sleep disordered breathing and periodic movements of sleep on the objective and subjective assessment of daytime somnolence in healthy aged adults. *Sleep Res* 1988;17:95.
- Rosenthal LD, Rosen A, Wittig RM, Zorick FJ, Roehrs TA, Roth T. A sleep-wake activity inventory to measure daytime sleepiness. *Sleep Res* 1991;20:130.
- Johns MW. A new method for measuring daytime sleepiness: the Epworth Sleepiness Scale. *Sleep* 1991;14:540-5.
- Johns MW, Gay TJA, Goodyear MDE, Masterton JP. Sleep habits of healthy young adults: use of a sleep questionnaire. *Br J Prev Soc Med* 1971;25:236-41.
- Zwyghuizen-Doorenbos A, Roehrs T, Schaeffer M, Roth T. Test-retest reliability of the MSLT. *Sleep* 1988;11:562-5.
- Johns MW. Polysomnography at a sleep disorders unit in Melbourne. *Med J Aust* 1991;155:303-8.
- Cronbach LJ. Coefficient alpha and the internal structure of tests. *Psychometrika* 1951;16:297-334.
- Munro BH, Visintainer MA, Page EB. *Statistical methods for health care research*. Philadelphia: J.B. Lippincott, 1986.
- Levine B, Roehrs T, Lamphere J, Zorick F, Stepanski E, Roth T. Daytime sleepiness in young adults. *Sleep Res* 1987;16:207.
- Di Phillipio MA, Fry JM, Pressman MR. Objective measurement of daytime sleepiness following treatment of obstructive sleep apnea with nasal CPAP. *Sleep Res* 1988;17:167.
- Johnson LC, Spinweber CL, Gomez SA, Matteson LT. Daytime sleepiness, performance, mood, nocturnal sleep: the effect of benzodiazepine and caffeine on their relationship. *Sleep* 1990;13(2):121-35.
- Mitler M, Gujavarty KS, Browman CP. Maintenance of wakefulness test: a polysomnographic technique for evaluating treatment in patients with excessive somnolence. *Electroencephalogr Clin Neurophysiol* 1982;153:658-61.

# The Children's Sleep Habits Questionnaire (CSHQ): Psychometric Properties of A Survey Instrument for School-Aged Children

Judith A. Owens MD, MPH,<sup>1</sup> Anthony Spirito PhD,<sup>2</sup> and Melissa McGuinn BS<sup>3</sup>

<sup>1</sup>*Division of Pediatric Ambulatory Medicine, Rhode Island Hospital, Associate Professor of Pediatrics, Brown University School of Medicine*

<sup>2</sup>*Child and Family Psychiatry, Rhode Island Hospital, Professor of Psychiatry and Human Behavior, Brown University School of Medicine*

<sup>3</sup>*Child and Family Psychiatry, Rhode Island Hospital, Brown University School of Medicine*

**Study Objectives:** To present psychometric data on a comprehensive, parent-report sleep screening instrument designed for school-aged children, the Children's Sleep Habits Questionnaire (CSHQ). The CSHQ yields both a total score and eight subscale scores, reflecting key sleep domains that encompass the major medical and behavioral sleep disorders in this age group.

**Design:** Cross-sectional survey.

**Setting:** Three elementary schools in New England, a pediatric sleep disorders clinic in a children's teaching hospital.

**Participants:** Parents of 469 school-aged children, aged 4 through 10 years (community sample), and parents of 154 patients diagnosed with sleep disorders in a pediatric sleep clinic completed the CSHQ.

**Interventions:** N/A

**Measurements and Results:** The CSHQ showed adequate internal consistency for both the community sample ( $\alpha=0.68$ ) and the clinical sample ( $\alpha=0.78$ ); alpha coefficients for the various subscales of the CSHQ ranged from 0.36 (Parasomnias) to 0.70 (Bedtime Resistance) for the community sample, and from 0.56 (Parasomnias) to 0.93 (Sleep-Disordered Breathing) for the sleep clinic group. Test-retest reliability was acceptable (range 0.62 to 0.79). CSHQ individual items, as well as the subscale and total scores were able to consistently differentiate the community group from the sleep-disordered group, demonstrating validity. A cut-off total CSHQ score of 41 generated by analysis of the Receiver Operator Characteristic Curve (ROC) correctly yielded a sensitivity of 0.80 and specificity of 0.72.

**Conclusions:** The CSHQ appears to be a useful sleep screening instrument to identify both behaviorally based and medically-based sleep problems in school-aged children.

**Key words:** Sleep habits; sleep survey; sleep disorders; pediatrics

## INTRODUCTION

IN CONTRAST TO WHAT IS KNOWN ABOUT SLEEP HABITS AND SLEEP DISTURBANCES IN INFANTS AND TODDLERS<sup>1-4</sup> AND IN PRESCHOOL-AGED CHILDREN,<sup>5-7</sup> relatively few studies have addressed these issues in latency-aged children.<sup>8-10</sup> Those studies which have examined sleep behavior in middle childhood<sup>11-13</sup> have employed a variety of different interviews, brief questionnaires, and sleep survey instruments, many of which do not have reliability and validity data reported. This has led

to considerable difficulties in comparing results across studies. Few of the sleep survey methods used in school-aged children examine both behaviorally-based (Limit Setting Sleep Disorder, Sleep Onset Association Disorder, etc.) and medical (Obstructive Sleep Apnea, Narcolepsy, etc.) sleep disorders, and most have not been formulated according to any of the standardized systems for categorization of clinical sleep disorders such as is contained in the *International Classification of Sleep Disorders (ICSD)* manual.<sup>14</sup> Finally, the definition of a sleep "disturbance" vs. a sleep "behavior" in these studies has been based on often arbitrary thresholds set by the authors and have not included parental definitions of sleep problems in the context of the individual family.

We present preliminary reliability and validity data on a parent-report sleep screening survey specifically

Accepted for publication September 2000

Address correspondence to: Judith A. Owens, MD, MPH, Pediatric Ambulatory Medicine, Rhode Island Hospital, 593 Eddy St., Potter Bldg., Suite 200, Providence, RI 02903. Tel: 401-444-8280; Fax: 401-444-6218; E-mail: JOwens@Lifespan.org

designed for school-aged (4 years through 10 years) children, the Children's Sleep Habits Questionnaire (CSHQ). The design of the CSHQ is based on common clinical symptom presentations of the most prevalent pediatric *International Classification of Sleep Disorders* diagnoses.<sup>14</sup>

## METHODS

### Participants

The community sample population consisted of 1099 students aged 4–10 years inclusive, enrolled in three public elementary schools, each of which was comprised of grades kindergarten through fourth grade. The three schools were in a predominantly white, middle-income, English-speaking suburban school district in Southeastern New England and were selected both on the basis of accessibility and as representative of a typical suburban community school system. Participants from each of the three schools were surveyed separately during one of three periods during the school year (Spring, Fall, Winter), in order to minimize potential seasonal differences in sleep habits. Sixty parents also responded voluntarily to a request for test-retest completion of the survey approximately two weeks later.

Of the total of 1099 questionnaire packets mailed, 520 questionnaires were not returned; there were 54 refusals, and 10 subjects moved (response rate = 46.9%). Twenty-six 11-year-old children were eliminated because of the decision to restrict the sample age distribution in order to minimize possible pubertal influences on sleep. Twenty children were excluded from the final sample because of a parent-reported history of having been diagnosed with a psychiatric condition (such as ADHD or depression) that could impact on sleep onset or night wakings and/or were receiving medication with likely effects on sleep, such as psychostimulants, anticonvulsants, or antihistamines. The final sample consisted of 469 children. The mean age of the sample was 7.6 years  $\pm$  1.5 years. There were 240 boys (51.2%) and 229 girls (48.8%).<sup>15</sup> Socioeconomic status was determined using the Hollingshead Form Index of Social Status<sup>15</sup> which is based on occupation and education. The mean Hollingshead SES score was 45.5 (SD=11.3).

The clinical population consisted of 154 patients consecutively diagnosed with a behavioral sleep disorder, a parasomnia or sleep-disordered breathing in a pediatric sleep disorders clinic in a children's teaching hospital in Southeastern New England. The data was collected over a four year period due to presentation rates of the specific diagnostic entities in the selected age group. Patients were divided into the three primary diagnostic groups following an extensive evaluation in the sleep clinic. In addition, the diagnosis of Obstructive Sleep Apnea Syndrome (OSAS) in all patients in the sleep disordered breathing group was

confirmed by standard one-night in-hospital polysomnographic (PSG) evaluation, including EEG monitoring for sleep staging, using a cut-off respiratory disturbance index of  $>1$  to define OSA.<sup>16</sup> The mean age of the clinical sample was 6.8 years (SD=1.7 yr.). There were 91 boys (59.1%) and 63 girls (40.9%). The mean Hollingshead SES score was 33.0 (SD=13.8).

The characteristics of the three clinical sample diagnostic groups were as follows: Behavioral Sleep Disorders group (n=43) (including Limit Setting Sleep Disorders, Sleep Onset Association Disorder, and Adjustment Sleep Disorder); 22 M, 21 F; mean age = 6.6 years (SD=1.6); Parasomnias group (n=45) (including Sleepwalking, Night Terrors and Confusional Arousals); 25 M, 20 F; mean age = 7.1 years (SD=1.7); and Sleep-Disordered Breathing group (n=66); 44 M, 22 F; mean age = 6.7 years (SD=1.7).

## MEASURE

The Children's Sleep Habits Questionnaire (CSHQ). The CSHQ is a retrospective, 45-item parent questionnaire that has been used in a number of studies to examine sleep behavior in young children.<sup>17-19</sup> The CSHQ includes items relating to a number of key sleep domains that encompass the major presenting clinical sleep complaints in this age group: bedtime behavior and sleep onset; sleep duration; anxiety around sleep; behavior occurring during sleep and night wakings; sleep-disordered breathing; parasomnias; and morning waking/daytime sleepiness. Parents are asked to recall sleep behaviors occurring over a "typical" recent week. Items are rated on a three-point scale: "usually" if the sleep behavior occurred five to seven times/week; "sometimes" for two to four times/week; and "rarely" for zero to one time/week. Some items were reversed in order to consistently make a higher score indicative of more disturbed sleep.

**Reduction of Sleep Variables.** For the purposes of further psychometric evaluation analysis, some of the CSHQ items were eliminated as redundant or ambiguous, and the remaining 35 were conceptually grouped into eight subscales reflecting the following sleep domains: 1) Bedtime Resistance, 2) Sleep Onset Delay, 3) Sleep Duration, 4) Sleep Anxiety, 5) Night Wakings, 6) Parasomnias, 7) Sleep-Disordered Breathing, 8) Daytime Sleepiness. Total Sleep Disturbance score included all items of the eight subscales, but consisted of only 33 items because two of the items on the Bedtime Resistance and Sleep Anxiety subscales were identical. Items contained in each of the subscales are listed in Table 1.

**Statistical Analysis.** The subscales were assessed for internal consistency using Cronbach's  $\alpha$ -coefficients. Means and standard deviations of each item in the subscales and the total subscale scores are listed in Table 1. Test-retest reliability was calculated using Pearson's corre-

**Table 1**—Unadjusted Means, Standard deviations for individual items and subscales, N, F values, Test-retest, and Alpha coefficients for the Subscales of the CSHQ

| Subscale Item                  | Control Sample |      |     | Clinic Sample |      |     | F      | df     | Z     | Control                    |               | Control |     | Clinic |     |
|--------------------------------|----------------|------|-----|---------------|------|-----|--------|--------|-------|----------------------------|---------------|---------|-----|--------|-----|
|                                | Mean           | SD   | N   | Mean          | SD   | N   |        |        |       | Test-retest r <sup>c</sup> | Test-retest N | α       | N   | α      | N   |
| 1. Bedtime Resistance          | 7.06           | 1.89 | 382 | 9.43          | 3.49 | 128 | 65.74  | 3, 506 | --    | 0.676**                    | 56            | 0.70    | 441 | 0.83   | 142 |
| Goes to bed at same time       | 1.18           | 0.53 | 402 | 1.30          | 0.57 | 130 |        |        | 3.57  | 0.163                      | 60            | ---     | --- | ---    | --- |
| Falls asleep in own bed        | 1.21           | 0.57 | 400 | 1.52          | 0.81 | 129 |        |        | 5.10  | 0.335                      | 58            | ---     | --- | ---    | --- |
| Falls asleep in other's bed    | 1.21           | 0.52 | 401 | 1.48          | 0.76 | 129 |        |        | 4.53  | 0.580                      | 59            | ---     | --- | ---    | --- |
| Needs parent in room to sleep  | 1.17           | 0.48 | 390 | 1.57          | 0.82 | 129 |        |        | 6.67  | 0.886                      | 58            | ---     | --- | ---    | --- |
| Struggles at bedtime           | 1.13           | 0.41 | 392 | 1.70          | 0.86 | 130 |        |        | 9.50  | 0.265                      | 58            | ---     | --- | ---    | --- |
| Afraid of sleeping alone       | 1.19           | 0.49 | 388 | 1.85          | 0.91 | 128 |        |        | 9.60  | 0.597                      | 59            | ---     | --- | ---    | --- |
| 2. Sleep Onset Delay           | 1.25           | 0.53 | 403 | 1.80          | 0.88 | 128 |        |        | 7.58  | 0.620**                    | 60            | ---     | --- | ---    | --- |
| Falls asleep in 20 minutes     |                |      |     |               |      |     |        |        |       |                            |               |         |     |        |     |
| 3. Sleep Duration              | 3.41           | 0.93 | 398 | 4.94          | 1.98 | 122 | 102.68 | 3, 516 |       | 0.400                      | 60            | 0.69    | 459 | 0.80   | 137 |
| Sleeps too little              | 1.21           | 0.42 | 400 | 1.78          | 0.86 | 127 |        |        | 7.69  | 0.420                      | 60            | ---     | --- | ---    | --- |
| Sleeps the right amount        | 1.13           | 0.43 | 400 | 1.73          | 0.84 | 124 |        |        | 9.73  | 0.452                      | 60            | ---     | --- | ---    | --- |
| Sleeps same amount each day    | 1.07           | 0.34 | 398 | 1.42          | 0.63 | 125 |        |        | 8.84  | 0.062                      | 60            | ---     | --- | ---    | --- |
| 4. Sleep Anxiety               | 4.89           | 1.45 | 374 | 7.09          | 2.44 | 119 | 114.13 | 3, 489 |       | 0.790**                    | 56            | 0.63    | 432 | 0.68   | 132 |
| Needs parent in room to sleep  | 1.17           | 0.48 | 390 | 1.57          | 0.82 | 129 |        |        | 6.67  | 0.886                      | 58            | ---     | --- | ---    | --- |
| Afraid of sleeping in the dark | 1.38           | 0.68 | 387 | 2.08          | 0.87 | 129 |        |        | 9.23  | 0.585                      | 59            | ---     | --- | ---    | --- |
| Afraid of sleeping alone       | 1.19           | 0.49 | 388 | 1.85          | 0.91 | 128 |        |        | 9.60  | 0.597                      | 59            | ---     | --- | ---    | --- |
| Trouble sleeping away          | 1.17           | 0.44 | 386 | 1.56          | 0.79 | 120 |        |        | 6.10  | 0.551                      | 58            | ---     | --- | ---    | --- |
| 5. Night Wakings               | 3.51           | 0.89 | 384 | 5.69          | 1.60 | 120 | 278.99 | 3, 500 |       | 0.634**                    | 56            | 0.54    | 437 | 0.44   | 135 |
| Moves to other's bed in night  | 1.17           | 0.44 | 392 | 1.76          | 0.82 | 126 |        |        | 9.58  | 0.584                      | 59            | ---     | --- | ---    | --- |
| Awakes once during night       | 1.31           | 0.55 | 393 | 2.13          | 0.76 | 121 |        |        | 11.45 | 0.682                      | 58            | ---     | --- | ---    | --- |
| Awakes more than once          | 1.03           | 0.16 | 385 | 1.86          | 0.83 | 126 |        |        | 15.19 | 0.018                      | 57            | ---     | --- | ---    | --- |
| 6. Parasomnias                 | 8.11           | 1.25 | 371 | 11.22         | 2.53 | 117 | 229.21 | 3, 484 |       | 0.618**                    | 57            | 0.36    | 425 | 0.56   | 132 |
| Wets the bed at night          | 1.12           | 0.43 | 380 | 1.30          | 0.61 | 125 |        |        | 4.48  | 1.000                      | 58            | ---     | --- | ---    | --- |
| Talks during sleep             | 1.22           | 0.44 | 393 | 1.72          | 0.77 | 127 |        |        | 7.97  | 0.392                      | 58            | ---     | --- | ---    | --- |
| Restless and moves a lot       | 1.37           | 0.58 | 390 | 2.26          | 0.83 | 127 |        |        | 11.30 | 0.572                      | 59            | ---     | --- | ---    | --- |
| Sleepwalks                     | 1.04           | 0.22 | 384 | 1.36          | 0.65 | 128 |        |        | 8.76  | 1.000                      | 58            | ---     | --- | ---    | --- |
| Grinds teeth during sleep      | 1.25           | 0.52 | 386 | 1.50          | 0.70 | 124 |        |        | 5.07  | 0.668                      | 57            | ---     | --- | ---    | --- |
| Awakens screaming, sweating    | 1.02           | 0.12 | 385 | 1.50          | 0.77 | 125 |        |        | 12.03 | 1.000                      | 58            | ---     | --- | ---    | --- |
| Alarmed by scary dream         | 1.10           | 0.30 | 389 | 1.53          | 0.73 | 126 |        |        | 8.72  | 0.858                      | 60            | ---     | --- | ---    | --- |



**Table 1 Continued**—Unadjusted Means, Standard deviations for individual items and subscales, N, F values, Test-retest, and Alpha coefficients for the Subscales of the CSHQ

| Subscale Item                              | Control Sample |      |     | Clinic Sample |      |     | F                 | df                 | Z                 | Control                    |               | Control |     | Clinic |                 |
|--------------------------------------------|----------------|------|-----|---------------|------|-----|-------------------|--------------------|-------------------|----------------------------|---------------|---------|-----|--------|-----------------|
|                                            | Mean           | SD   | N   | Mean          | SD   | N   |                   |                    |                   | Test-retest r <sup>c</sup> | Test-retest N | α       | N   | α      | N               |
| 7. Sleep Disordered Breathing <sup>d</sup> | 3.24           | 0.63 | 382 | 4.71          | 2.54 | 17  | 35.57             | 3, 395             |                   | 0.688**                    | 58            | 0.51    | 439 | 0.93   | 18 <sup>b</sup> |
| Snores loudly                              | 1.19           | 0.44 | 392 | 1.84          | 0.92 | 126 |                   |                    | 8.28              | 0.463                      | 58            | ---     | --- | ---    | ---             |
| Stops breathing                            | 1.01           | 0.13 | 385 | 1.46          | 0.83 | 24  |                   |                    | 8.14              | 1.000                      | 58            | ---     | --- | ---    | ---             |
| Snorts and gasps                           | 1.05           | 0.27 | 384 | 1.41          | 0.80 | 17  |                   |                    | 3.41              | 0.816                      | 58            | ---     | --- | ---    | ---             |
| 8. Daytime Sleepiness                      | 9.64           | 2.80 | 381 | 11.99         | 3.39 | 119 | 1.59 <sup>a</sup> | 3,149 <sup>b</sup> |                   | 0.649**                    | 56            | 0.65    | 437 | 0.70   | 134             |
| Wakes by himself                           | 1.76           | 0.87 | 398 | 1.65          | 0.78 | 129 |                   |                    | 0.69 <sup>b</sup> | 0.666                      | 59            | ---     | --- | ---    | ---             |
| Wakes up in negative mood                  | 1.32           | 0.50 | 396 | 1.74          | 0.70 | 128 |                   |                    | 7.25              | 0.536                      | 58            | ---     | --- | ---    | ---             |
| Others wake child                          | 1.95           | 0.78 | 398 | 2.05          | 0.80 | 128 |                   |                    | 0.94 <sup>b</sup> | 0.543                      | 60            | ---     | --- | ---    | ---             |
| Hard time getting out of bed               | 1.46           | 0.64 | 395 | 1.63          | 0.77 | 128 |                   |                    | 2.47 <sup>b</sup> | 0.415                      | 59            | ---     | --- | ---    | ---             |
| Takes long time to be alert                | 1.25           | 0.49 | 393 | 1.55          | 0.72 | 127 |                   |                    | 5.42              | 0.607                      | 59            | ---     | --- | ---    | ---             |
| Seems tired                                | 1.23           | 0.43 | 392 | 1.85          | 0.69 | 123 |                   |                    | 10.76             | 0.291                      | 60            | ---     | --- | ---    | ---             |
| Watching TV                                | 0.19           | 0.53 | 400 | 0.65          | 0.75 | 124 |                   |                    | 8.57              | 0.451                      | 60            | ---     | --- | ---    | ---             |
| Riding in car                              | 0.50           | 0.81 | 401 | 0.77          | 0.81 | 124 |                   |                    | 4.46              | 0.637                      | 60            | ---     | --- | ---    | ---             |

a All F values for the subscale scores were significantly different at  $P < 0.001$  except where there are "a" superscripts.

b Z=Mann-Whitney U-test; all are significantly different at  $P < 0.001$  level except for those with "b" superscript.

c Subscale correlations are Pearson's r values; Item-by-item correlations are Spearman's r values.

d The items on this subscale were changed toward the end of clinic data collection, which accounts for the low number of subjects.

\*\*\* = significant at the 0.001 level

\*\* = significant at the 0.01 level

\* = significant at the 0.05 level

lation coefficients for the subscale scores and Spearman's correlation coefficients for the item scores. Because the subscale scores were not normally distributed, the scores were log transformed and then a Bonferroni correction was applied to the item analyses in order to correct for multiple comparisons. The control and clinical samples were compared using an analysis of covariance (ANCOVA), covarying age and SES. Individual items were compared on the Mann-Whitney U-test because age and SES varied across the samples, we also divided the samples by age (four to seven years/eight to ten years) and SES (low/high) and calculated Mann-Whitney U-tests on the items for each subdivided sample. Because the statistically significant findings changed little using these subsamples, only the findings for the total sample are presented.

## PROCEDURES

### Control Sample

A packet containing informed consent forms; a brief survey regarding parents' education and occupation and any significant medical problems and/or medication for the child; and the Children's Sleep Habits Questionnaire, were sent home with the student to be completed by the parent/guardian. A second mailing and reminder were sent to all parents who had not returned the questionnaire within two weeks of the initial mailing. This procedure was approved by the hospital Institutional Review Board as well as the town's school board. We were unable to obtain information on non-responders because of school board request for anonymity.

### Clinical Sample

Patients referred to a pediatric sleep disorders clinic received the CSHQ in the mail to complete prior to the clinic appointment. Parents brought the CSHQ to their appointment at the sleep clinic and the responses were reviewed with the parents by staff conducting the clinical interview.

## RESULTS

### Preliminary Analyses

The community and clinical samples did not differ by gender,  $\chi^2(1,623) = 2.92$ , ns. The two groups did differ by age,  $t(621) = 5.47$ ,  $p < 0.001$ , with the community sample ( $M = 7.6$  years,  $SD = 1.5$  years), significantly older than the clinic sample ( $M = 6.8$  years,  $SD = 1.7$  years). The two groups also differed by SES,  $t(538) = 10.47$ ,  $p < 0.001$ , with the community sample ( $M = 45.5$ ,  $SD = 11.3$ ) having a higher SES score than the clinic sample ( $M = 33.0$ ,  $SD = 13.8$ ).

There was no difference between the three clinical subgroups by gender,  $\chi^2(2,154) = 2.92$ , ns; or age,  $F(2,151)$

$= 1.14$ , ns. There was a significant difference on Hollingshead SES,  $F(2,132) = 6.76$ ,  $p < 0.01$ . Post hoc testing with Tukey HSD revealed that the Sleep-Disordered Breathing group ( $28.6 \pm 11.7$ ) had a lower SES score than either the Behavioral ( $38.5 \pm 15.4$ ) or Parasomnia ( $34.0 \pm 13.1$ ) groups.

### Internal Consistency

The internal consistency of the entire CSHQ was 0.68 for the community sample and 0.78 for the clinical sample. The alpha coefficients for the subscales are listed in Table 1. Alphas ranged from 0.36 to 0.70 in the community sample. Items were systematically dropped from each of the subscales, with the exception of sleep onset delay which has only one item, to determine if this improved internal consistency. For the community subjects, dropping items 2 (goes to bed same time) and 11 (struggles at bedtime) from the Bedtime Resistance subscale only increased the alpha from 0.70 to 0.73. Dropping items from the Sleep Duration subscale lowered the alpha coefficient on the Sleep Duration subscale. Dropping items 12 (afraid of sleeping in dark) and 29 (trouble sleeping away) increased the alpha slightly from 0.63 to 0.65 on the Sleep Anxiety subscale; dropping single items only lowered the score. Dropping item 34 (awoken more than once) from the Night Wakings subscale increased the alpha from 0.54 to 0.55. If items 19 and 25 (bedwetting and teeth grinding) are eliminated from the Parasomnias subscale, the alpha coefficient improves from 0.36 to 0.45. Dropping item 26 (snores loudly) improved the alpha coefficient to 0.58 from 0.51 on the Sleep-Disordered Breathing subscale. Finally, on the Daytime Sleepiness subscale, dropping five items increased the alpha coefficient to 0.76 from 0.65 (wakes negative mood, takes long time to be alert, seems tired, falls asleep watching TV and riding in the car).

For the clinical sample, alpha coefficients ranged from 0.44 to 0.83. Dropping four items from the Bedtime Resistance subscale increased the alpha from 0.83 to 0.86; dropping item 18 (sleeps same amount) increased the Sleep Duration subscale alpha from 0.79 to 0.89; dropping items 12 and 29 raised the Sleep Anxiety subscale from 0.68 to 0.77; dropping item 33 (awakes once) increased the alpha on the Night Wakings subscale from 0.44 to 0.48; dropping item 19 from the Parasomnias subscale increased the alpha from 0.56 to 0.61; and dropping the five items (Above) increased the alpha on the Daytime Sleepiness subscale from 0.70 to 0.80. Dropping items did not change the alpha coefficient on the Sleep-Disordered Breathing subscale.

### Test-Retest Reliability

Test-retest reliability was assessed in a volunteer sample of 60 parents from the community sample who responded to a request to complete a second rating of the CSHQ at a

**Table 2**—Intercorrelation matrix among CSHQ subscales for both control (N = 469) and clinical (N = 154) samples

|                       | 1    | 2    | 3    | 4     | 5     | 6     | 7    | 8     |
|-----------------------|------|------|------|-------|-------|-------|------|-------|
| 1. BEDTIME RESISTANCE | -    | .397 | .170 | .203  | .430  | .228  | .813 | .372  |
| 2. SLEEP DURATION     | .431 | -    | .292 | .262  | .410  | .626  | .345 | .495  |
| 3. PARASOMNIA         | .212 | .133 | -    | -.160 | .396  | -.325 | .229 | -.003 |
| 4. SDB                | .126 | .057 | .202 | -     | -.270 | -.001 | .153 | -.176 |
| 5. NIGHT WAKINGS      | .337 | .239 | .340 | .016  | -     | -.057 | .460 | .266  |
| 6. DAYTIME SLEEPINESS | .152 | .156 | .127 | .182  | -.029 | -     | .264 | .519  |
| 7. SLEEP ANXIETY      | .629 | .250 | .186 | .066  | .284  | .081  | -    | .316  |
| 8. SLEEP ONSET DELAY  | .140 | .265 | .119 | .080  | .126  | .163  | .035 | -     |

two-week interval. The Pearson's correlations for three subscales and the Spearman's rank order correlations for each of the items are presented in Table 1. The correlations for the subscales ranged from 0.62 to 0.79, which is an acceptable level. T-tests between the subscales for the two administrations were all non-significant.

### Interrelationships Among Subscales

The correlation matrix for each of the subscales of the CSHQ was calculated separately for the community and clinical samples. As can be seen at least in part in Table 2, because the two subscales had two items in common, bedtime resistance and sleep anxiety for both the clinical ( $r = 0.81$ ) and community ( $r = 0.63$ ) samples were the most highly correlated subscales. When these two items were dropped and correlations were recalculated, the coefficients dropped in both the clinical ( $r = 0.42$ ) and community ( $r = 0.19$ ) samples. In general, the intercorrelations among the subscales were higher for the clinical sample than the community sample.

### Distribution of CSHQ Total Scores

The total scores for the community sample ranged from 6 to 83 ( $M = 56.2$ ,  $SD = 8.9$ ). For the clinical sample, the total scores ranged from 7 to 114 ( $M = 68.4$ ,  $SD = 13.7$ ). An effect size of 1.06 was calculated, suggesting this difference was clinically significant. Fifty-six percent (56%) of the clinical group had scores one standard deviation above the mean of the community sample. The distributions of the community and clinical samples are displayed in Figure 1. There was also a significant difference between the three clinical groups on the total CSHQ score,  $F(2,143) = 5.44$ ,  $p < .01$ . Post-hoc tests revealed that the Behavioral Sleep Disorders group ( $M = 74.4$ ,  $SD = 9.7$ ) had significantly higher scores in the CSHQ than either the Parasomnias ( $M = 66.3$ ,  $SD = 12.9$ ) or Sleep-Disordered Breathing ( $M = 66.1$ ,  $SD = 16.4$ ) groups. Effect size calculations indicated that the differences between the Behavioral Sleep Disorders Group and the Parasomnia and Sleep-Disordered Groups were moderate to large ( $d = .61$ ,  $d = .70$ , respective-

ly). There was a larger percentage of children in both the Parasomnia and Sleep-Disorder Breathing groups (60.9%) that had total CSHQ scores below the clinical sample mean of 68.4 compared to the percentage in the Behavioral Sleep Disorders group (27.5%).

### Sleep Duration

The only item not listed on Table 1 is the number of hours of sleep per night. The mean (weekday) sleep duration as reported by parents in the community sample was 10.16 hours  $\pm$  44.48 minutes (median = 10 hours), with a range from 7 to 14.0 hours. This broad range is somewhat misleading in that there were several outliers at both ends of the distribution. Age and sleep duration were significantly but modestly negatively correlated ( $r = -0.17$ ,  $p < 0.01$ ) in the control sample.

In the clinical sample, the mean weekday sleep duration reported by parents was 9.4 hours  $\pm$  3 hours (median = 10 hours) with a range from 3.5 to 14.0 hours. Age and sleep duration were not significantly related in the clinical sample, ( $r = -0.01$ , ns). An ANCOVA comparing two groups and covarying age and SES revealed the clinical sample slept significantly less than the community sample  $F(3,520) = 104.36$ ,  $p < 0.0001$ .

### Validity

Validity was investigated by comparing the clinical sample to the community sample for each of the items and the subscales of the CSHQ. Due to the large number of comparisons, statistical significance was set at  $p < 0.001$  for the individual items based on a Bonferroni correction. Each of the items was compared across groups using a Mann-Whitney U-test analysis. As can be seen in Table 1, the clinical group had higher (worse) scores than the community group on all items with the exception of item 38 (wakes by self). For 30 out of 33 items, the difference was statistically significant at the  $p < 0.001$ . Only three items on the Daytime Sleepiness subscale were not significant at the  $p < 0.001$  level.

ANCOVAS, covarying age and SES, indicated that the

clinical sample had significantly higher (worse) scores than the community group ( $P < 0.001$ ) on all subscales (see Table 1). There was also a significant difference between the clinical ( $M = 68.4$ ,  $SD = 12.1$ ) and the control ( $M = 56.2$ ,  $SD = 8.6$ ) groups on the total score of the CSHQ, after controlling for age and SES,  $F(3,531) = 136.56$ ,  $p < 0.0001$ .

Because there were age differences between the clinical and community samples, the Mann-Whitney U-tests were repeated separately for younger (four to seven year olds) and older (eight to ten year olds) samples. The findings were identical in the younger sample. There were four additional nonsignificant differences between the clinical and community samples: goes to bed at the same time, falls asleep in other's bed, falls asleep riding in car, and wets the bed at night. The sample was also divided using a median split on SES and Mann-Whitney U-tests repeated for high and low SES samples. The results were identical to the entire sample.

The three clinical groups were also compared on the subscales of the CSHQ using an analysis of variance. Statistically significant differences were found on all subscales with post hoc testing indicating that differences were in the predicted direction. For the Bedtime Resistance subscale,  $F(2,139) = 11.11$ ,  $p < 0.0001$ , the Behavioral group had significantly higher scores than both the Sleep-Disordered and Parasomnias groups. The same pattern was also true for Sleep Duration,  $F(2,139) = 14.07$ ,  $p < 0.0001$ , Sleep Anxiety,  $F(2,131) = 7.25$ ,  $p < 0.001$ , and Sleep Onset subscales,  $F(2,140) = 45.27$ ,  $p < 0.0001$ . As expected, the Parasomnias group had higher scores on the Parasomnias subscale,  $F(2,129) = 7.91$ ,  $p < 0.001$ , than the other two groups. The Sleep-Disordered Breathing group has significantly higher scores than the other two clinical groups on the Sleep Disordered-Breathing subscale,  $F(2,15) = 54.61$ ,  $p < 0.0001$ . There was a smaller number of subjects for this latter analysis because two of the three items on this subscale were added to the scale towards the end of the study. However, on the snoring item of the subscale which had complete data, the Sleep-Disordered Breathing group had higher scores than the other two clinical groups. On the Night Wakings subscale, the Sleep-Disordered Breathing group had higher scores than both the Behavioral and the Parasomnias group,  $F(2,132) = 9.67$ ,  $p < 0.0001$ . On the Daytime Sleepiness subscale, the Sleep-Disordered Breathing had higher (worse) scores than the Parasomnias group.

Sensitivity and specificity were examined using the Receiver Operator Characteristic (ROC) curve.<sup>20</sup> The estimated prevalence score of 40% for sleep problems was based on previous survey data in school-aged children.<sup>10,21-23</sup> These studies have reported a combined prevalence of bedtime struggles and night wakings of between 25% and 35% and an overall prevalence of "sleep" difficulties of 43%.<sup>22</sup> A cut-off score which maximized sensitivity was

sought based on the belief that it was more important to avoid false negatives than false positives. The cut-off score with the best diagnostic confidence, as determined by the intersect point of sensitivity and specificity, was 41, which corresponded to the upper 23.2% of the control group's CSHQ total score. Using the cut-off score of 41, sensitivity was calculated at 0.80 and specificity at 0.72. This score correctly identifies 80% of the clinical group.

## DISCUSSION

This paper reports the psychometric properties of a sleep screening questionnaire designed primarily for surveying sleep habits and sleep disturbances in community populations. The distribution of scores for the total score and the subscales suggest that these scores have an acceptable range of variability. Based on the criterion of 0.70,<sup>24</sup> the internal consistency coefficients of the entire scale are near (0.68) or above (0.78), acceptable standards for the community and clinical samples, respectively. There was a wider range of internal consistency coefficients among the subscales, with the alpha coefficients of the subscales for the clinical sample higher than those for the community sample. The subscales with the highest internal consistency coefficients in the clinical sample were Sleep Duration, Bedtime Resistance, Daytime Sleepiness and Sleep Anxiety. The stability of the CSHQ was demonstrated by acceptable test-retest reliability coefficients.

The subscale-to-subscale correlations were strongest in the clinical sample and highest between bedtime resistance and sleep anxiety, sleep duration and daytime sleepiness, and daytime sleepiness and sleep onset delay. Similarly, in the community sample, sleep duration and bedtime resistance, and sleep anxiety and bedtime resistance, were most highly correlated. These subscale intercorrelations suggest that the CSHQ taps the relatively distinct sleep behaviors described in the sleep medicine literature. That is, daytime sleepiness, bedtime resistance, sleep anxiety, sleep duration, and even the sleep onset delay subscales are related, although there may be different underlying sleep disorders causing these sleep symptoms. However, the other subscales—parasomnias, sleep disordered breathing, and night wakings—represent other types of sleep problems. It is important to note that in order to achieve subscales with greater discriminatory power between subscales, more items per subscale would be necessary. We feel that the brevity of the CSHQ is a strength, however, and thus we have chosen to keep the scale at its current length.

The validity of the CSHQ was demonstrated by the ability of the items, subscales, and total score of the CSHQ to consistently differentiate non-sleep disordered children from those seeking an evaluation due to a suspected sleep disorder, although there was overlap in the distribution of scores. Given the high prevalence of sleep problems reported in the literature<sup>6,7,10</sup> in children of a similar age distri-

bution to those in the community sample, it is not surprising that we found this overlap. The broad range of CSHQ scores of both the clinical and community samples reflects this overlap; in addition, because the construction of the subscales on the CSHQ is weighted toward items pertaining to difficulties with initiating and maintaining sleep, the total CSHQ scores tend to be scored (higher) for those children in either sample with behavioral sleep disorders. When the clinical group was subdivided into different sleep disorders, the subscales differed across the three clinical groups in the predicted directions, suggesting the scale has utility within clinical populations. Within the community sample, as previously reported, CSHQ total and subscale scores did not differ significantly by gender or SES, but there was a higher frequency of reported bedtime struggles and night wakings in younger compared to older (grades 3 and 4) children.<sup>23</sup>

We elected to group items together conceptually according to presenting symptom constellations rather than to rely on a statistical procedure to derive empirically related subscales. There have been a few factor analytic studies published in the literature to date of similar children's sleep scales. For example, a factor analysis of the Children's Sleep Behavior Scale,<sup>25</sup> using a community sample, resulted in five factors characteristic of parasomnias, bedtime resistance, activity during sleep, sleep anxiety, and positive affect. These factors did not correspond very well to clinical diagnostic categories. The Sleep Disturbance Scale for Children<sup>11</sup> has a factor structure closer to the clinical categories of disorders of initiating and maintaining sleep, sleep disordered breathing, disorders of arousal/nightmares, sleep wake transition disorders, disorders of excessive somnolence, and sleep hyperhydrosis. Although this factor analysis seems more clinically useful than that derived from the CSBS, the categories are rather broad when compared to the conceptually derived subscales presented here.

It should be noted that the CSHQ is designed primarily to be a screening tool. The sleep domains reflected in seven of the CSHQ subscales do parallel symptom constellations associated with *ICSD* (revised) classifications that represent the most common sleep disorders in this age group: Dyssomnias—Intrinsic and Extrinsic Sleep Disorders, including Sleep Onset Association Disorder, Limit Setting Sleep Disorder, Adjustment Sleep Disorder and Inadequate Sleep Hygiene, and Circadian Rhythm Sleep Disorders, including Delayed Sleep-Phase Syndrome, (CSHQ Subscales, Bedtime Resistance, Sleep Onset Delay, Sleep Duration, Sleep Anxiety and Night Wakings); Parasomnias; Obstructive Sleep Apnea (CSHQ Subscale, Sleep-Disordered Breathing). The Daytime Sleepiness Subscale reflects the daytime consequences common to many of these disorders. However, it should be noted that the subscale labels were not intended to be diagnostic or to define

the underlying etiology of the presenting sleep symptoms. The items on the Sleep Anxiety Subscale, for example, could be associated with sleep onset delay related to such diagnostic entities as a circadian phase delay, nightmares, or a more generalized anxiety disorder, among others. The utility of the various subscale scores on the CSHQ is in both alerting the clinician of a potential sleep disorder and providing information that would serve as the starting point for a more detailed clinical evaluation. It is also important to note that clinical category systems for diagnosing childhood sleep disorders, including the *ICSD* classification, have yet to be sufficiently validated.

The limitations of this study must be considered in evaluating the suitability of this scale. As in any parent report measure, the role of both parental and retrospective bias in completing the scale must be considered. Despite data suggesting that parental report is reasonably accurate for identifying many types of sleep disturbances when compared to objective data such as actigraphy,<sup>16</sup> parents of older children, in particular, may not always be aware of any difficulties initiating and maintaining sleep. The survey was cross-sectional and asked only for the frequency of sleep behaviors over a week time period, which may have resulted in inaccurate assessments of the prevalence of more episodic sleep phenomena, such as sleepwalking or night terrors. In addition, the short time frame might have resulted in relative over-reporting of very transient sleep disturbances. However, the test-retest reliability results suggest that there was good consistency in the types and severity of sleep disturbances reported over at least a three-week period. The survey also did not significantly address possible irregularities in sleep-wake cycles related to differences in bedtimes on school vs. non-school nights. However, it would be important to specifically ask parents to clarify any discrepancies in using the survey in older children, in particular.

An additional limitation is the use of the 20 minute criteria for prolonged sleep onset latency, which may be an overly liberal definition for school-aged children. The validity of the CSHQ in the clinical setting, therefore, would be enhanced by the addition of a sleep log to some specifically delineate any sleep delay. Also, because of the importance of developmental factors in sleep disturbances, the results of this study may not be generalizable to children older than the age range of the sample. We chose to limit the upper age range of the sample to 10 years in order to minimize the possible effects of pubertal changes on sleep behavior. More detailed results of the influence of age on sleep behavior from this study have been reported previously.<sup>23</sup> Finally, an additional limitation is that there may also have been children in the community sample who had undiagnosed sleep disorders.

The sensitivity and specificity analysis suggest that the CSHQ may have utility as a screening instrument for sleep

disorders in the clinical practice setting. Data from a recent survey of almost 500 pediatric health care providers<sup>22</sup> suggests that practicing physicians inadequately screen for sleep problems, especially in middle childhood. Thus, a brief parent-report survey such as the CSHQ could provide a relatively simple tool for identifying problematic sleep in the context of a well child encounter, for example. The eight CSHQ subscales roughly correspond to the most common presenting sleep complaints in pediatric practice—bedtime struggles; difficulty falling asleep, inadequate sleep, nighttime fears, sleepwalking/night terrors, night wakings, and difficulty getting up in the morning.<sup>23</sup> Although the CSHQ should not be used to make definitive sleep disorder diagnoses, both the cut-off total score and individual subscale score could be utilized to identify children with sleep disturbances, and highlight sleep domains which warrant further clinical evaluation. With that in mind, the cut-off was set at a level that maximized sensitivity and thus minimized false negatives. It should be noted, however, that because behavioral sleep disorders “drive” the CSHQ, even children with low total scores may have a sleep problem in a specific, “non-behavioral” (e.g., parasomnias) area. Therefore, it is important to examine the individual subscales in all children, regardless of the total score.

In summary, the CSHQ appears to be a useful sleep screening instrument to delineate sleep habits and identify problematic sleep domains in school-aged children. In particular, the CSHQ could be useful in identifying co-morbid sleep disturbances which might complicate the presentation of underlying medical or mental health concerns in children, including chronic illnesses such as juvenile rheumatoid arthritis,<sup>24</sup> and psychiatric diagnoses, such as attention deficit hyperactivity disorder.<sup>25</sup> Additional studies should address the use of the CSHQ in other populations, in order to provide further evidence of its utility in a variety of settings.

## REFERENCES

- Carey W. Night waking and temperament in infancy. *J Pediatr* 1974;84:756-758.
- Anders TF. Night waking in infants during the first year of life. *Pediatrics* 1979;64:860-864.
- Richman N. A community survey of characteristics of one to two year olds with sleep disruptions. *J Am Acad Child Psychiatr* 1981;20:281-291.
- Lozoff B, Wolf AW, Davis NS. Cosleeping in urban families with young children in the United States. *Pediatrics* 1984;74:171-182.
- Pollock JI. Night-waking at five years of age: predictors and prognosis. *J Child Psychol Psychiatr* 1994;35(4):699-708.
- Beltramini AU, Hertzog ME. Sleep and bedtime behavior in preschool-aged children. *Pediatrics* 1983;71(2):153-158.
- Kerr S, Jowett S. Sleep problems in pre-school children: a review of the literature. *Child Care Health Develop* 1994;20:379-391.
- Fisher BE, Eilson AE. Selected sleep disturbances in school children reported by parents: prevalence, interrelationships, behavioral correlates and parental attributions. *Perceptual Motor Skills* 1987;64:1147-1157.
- Bruni O, Ottaviano S, Guidetti V, et al. The sleep disturbance scale for children (SDSC) construction and validation of an instrument to evaluate sleep disturbances in childhood and adolescence. *J Sleep Res* 1996;5:251-261.
- Blader JC, Koplewicz HS, Abikoff H, Foley C. Sleep problems of elementary school children: a community survey. *Arch Pediatr Adolesc Med* 1997;151:473-480.
- Petta D, Carskadon M, Dement W. Sleep habits in children aged 7 to 13 years. *Sleep Res* 1984;13:86.
- Saarenpaa-Heikkila OA, Rintahak PJ, Laippala PJ, Koivikko MJ. Sleep habits and disorders in Finnish school children. *J Sleep Res* 1995;4:173-182.
- Alves R, Prado G, Prado L, Bauab J, Passos A, Silva A. Prevalence of sleep problems among 7 to 10 year-old normal children. Abstract in *Sleep* 1998;21 (Supplement):137.
- International Classification of Sleep Disorders. Diagnostic and coding manual. Diagnostic classification steering committee. Thorpy MJ, Chairman. Rochester, MN: American Sleep Disorder Association, 1990.
- Hollinghead AG. Four factor index of social status. Unpublished manuscript. New Haven, Yale University Press; 1975.
- Marvus CL, Omlin KJ, Basinski DJ, et al. Normal polysomnographic values for children and adolescents. *Am Rev Respir Dis* 1992;146:1235-1239.
- Seifer R, Sameroff A, Dickstein S, Hayden LC, Schiller M. Parental psychopathology and sleep variation in children. *Sleep Dis* 1996;5(3):715-727.
- Owens J, Maxim R, Nobile C, McGuinn M, Alario A, Msall M. Television viewing habits and sleep disturbances in school-aged children. *Pediatrics* 1999;104(3):e27.
- Owens J, Fernando S, McGuinn M, Alario A. Sleep disturbance, daytime sleepiness and injuries in pre-school children. Abstract, Ambulatory Pediatric Association 39th Annual Meeting, San Francisco, May 1999.
- Fletcher RH, Fletcher SW, Wagner EH. Clinical epidemiology: the essentials. 2nd ed., Baltimore, MD: Williams and Wilkins, 1988.
- Simons J, Parraga H. Prevalence of sleep disorders and sleep behaviors in children and adolescents. *Jl of Amer acad Child Psych* 1982;21(4):383-388.
- Kahn A, et al. Sleep problems in health preadolescents. *Pediatrics* 1989;84(3):542-46.
- Owens JA, Spirito A, McGuinn M, Nobile C. Sleep habits and sleep disturbance in elementary school-aged children. *Journal of Developmental & Behavioral Pediatrics* 2000;21(1):27-36.
- Nunnally JC, Bernstein IH. Psychometric theory, 3rd edition. New York: McGraw-Hill, 1994.
- Fisher BE, Pauley C, McGuire K. Do diagnostic patterns exist in the sleep behaviors of normal children. *J Abnor Child Psychol* 1990;18:179-186.
- Owens J, McGuinn M, Dube C: The practice of pediatric sleep medicine: preliminary results of a regional community survey. Abstract, Society of Behavioral and Developmental Pediatrics Annual Meeting, Seattle, WA, September, 1999.
- Lozoff B, Wolff AW, Davis NS. Sleep problems in pediatric practice. *Pediatrics* 1985;75:477-483.
- Bloom B, Alario A, Nobile C, Owens J. The association of sleep disturbance with disease activity and parent-reported pain in children with JRA. Abstract, Society of Developmental. Behavioral Pediatrics Annual Meeting, Cleveland, OH, September, 1998.
- Corkum P, Tannock R, Moldofsky H. Sleep disturbances in children with attention-deficit/hyperactivity disorder. *J Am Acad Child Adolesc Psychiatr* 1998;37:6.

**Appendix 3:**  
**Sample Sleep Prescription**

Created by Gruber et al.

Gruber R, Weiss S, Frappier J, et al. Position statement on pediatric sleep. 2013. <http://www.canadiansleepsociety.ca/publisher/articleview/frmArticleID/396>.

## Child Sleep Prescription

Name (First, Last): \_\_\_\_\_

Age: \_\_\_\_\_ years \_\_\_\_\_ months

Grade Level: \_\_\_\_\_

Recommended bedtime: \_\_\_\_\_ pm

Recommended wake time: \_\_\_\_\_ am

**\*Goal:** \_\_\_\_\_ hours of sleep

### ***Important Reminders:***

#### DO NOT:

- Use stimulating objects or electronic devices too close to bedtime (e.g., books, toys, video games, televisions, and computers).
- Complete homework right before bedtime, or within the bedroom. If homework is done on or near a child's bed, they may associate that area with working or stress and may not be able to fall asleep easily there.
- Have a heavy meal right before (i.e., within 1 hour of) bedtime.

#### DO:

- Have a regular and consistent bedtime routine. It should start at approximately the same time every night and be relaxing (e.g. bath, snack, brush teeth, put on pajamas, talk with parents, read).
- Have a light healthy snack to avoid going to bed hungry.



## **Appendix 4:**

### **Sleep Recommendations for Expecting Parents and Families of Newborns**

Created by Gruber et al.

Gruber R, Weiss S, Frappier J, et al. Position statement on pediatric sleep. 2013. <http://www.canadiansleepsociety.ca/publisher/articleview/frmArticleID/396>.

## **Sleep Recommendations for Expecting Parents and Families of Newborns**

Health care providers can help parents learn how to promote their child's development of healthy sleep by:

- 1) Providing parents with information regarding normative sleep patterns across infancy and early childhood.
- 2) Suggesting concrete strategies to promote healthy sleep:
  - Help parents help their infants to differentiate between day and night by recommending the following strategies:
    - Establish a bedtime and nap times for the child at approximately the same time each day.
    - Provide a sleeping environment that is darkened at night-time
    - Expose the infant to bright day light for several hours during the day every day
    - Ensure that interactions and playtime are concentrated during the daytime only
  - Help parents promote the baby's development of self-soothing skills using the following strategies:
    - Explain to parents that infants need to learn to fall asleep at bedtime, independently, as well as how to fall back asleep after awakening during the night without their assistance.
    - Suggest putting the baby down when they appear to be drowsy, but are not yet asleep.
- 3) Emphasizing the importance of maternal (parental) sleep:
  - Review potential challenges associated with sleep deprivation that can affect parenting quality; for example, negative mood, irritability, impulsivity, forgetfulness, inattentiveness, safety while driving.
  - Offer strategies to minimize parental sleep deprivation including:
    - Taking naps whenever possible – for example, when the baby naps
    - Going to bed earlier
    - Prioritizing sleep
    - Practising relaxation techniques
    - Practising good “sleep hygiene”

Created by Gruber et al.

Gruber R, Weiss S, Frappier J, et al. Position statement on pediatric sleep. 2013. <http://www.canadiansleepsociety.ca/publisher/articleview/frmArticleID/396>.

# Do you find it impossible to get your teenager to sleep?

*Here are some suggestions that may make it easier*

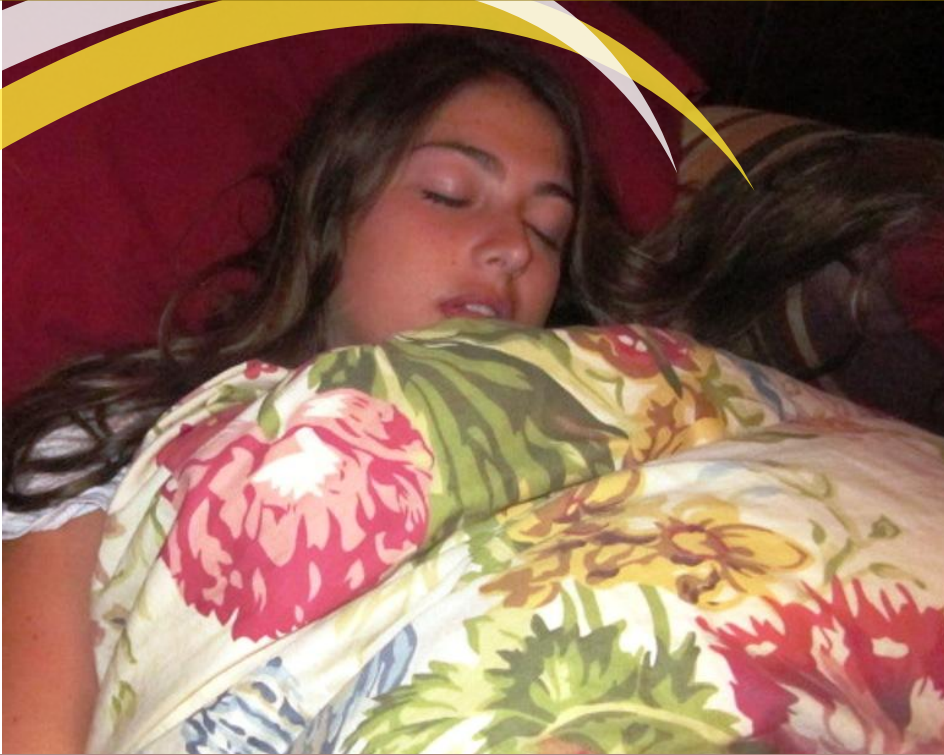

## HAVE YOU ALREADY TRIED TALKING TO YOUR TEEN ABOUT THE IMPORTANCE OF SLEEP BUT ARE NOT SEEING ANY CHANGES?

Here are some tips to increase their *motivation*:

- **Set clear and consistent boundaries at home:** Try working together with your child to set fair bedtime rules
- **Provide opportunities for participation in decision making:** Allow your child to take responsibility for their sleep habits by inviting him/her to propose goals and measure progress
- **Create a safe and respectful family atmosphere:** A supportive home environment will allow your child to feel validated and promote confidence to take charge of his/her health
- **Use incentive plans:** Offering rewards that your child values (for example, fewer household chores) can foster motivation to improve sleep practices
- **Promote autonomy:** Try to let your child verbalize the decision to change sleep habits on his/her own. It is important not to impose sleep information or behaviour!

## WHAT STRATEGIES SHOULD YOU PROVIDE YOUR TEEN TO ENCOURAGE HEALTHY SLEEP?

- Go to bed and wake up at the same time every day (even on the weekends!)
- Avoid consuming caffeine (coffee, soft drinks, chocolate) starting in the late afternoon
- Expose yourself to bright lights in the morning
- Make your bedroom comfortable for sleep. Think about the noise, light, temperature, mattress, and pillow!
- Reserve your bed for sleeping only- keep cell phones, computers, televisions, out of your bedroom
- Try to exercise 20-30 minutes every day but at least 3 hours before going to bed
- Have a relaxing routine before bed- ideas include bathing, music, and reading
- Don't go to bed feeling hungry, but also don't eat a heavy meal right before bed

Resource for parents: Created by  
Reut Gruber and Jamie Cassoff

**Douglas**  
INSTITUT UNIVERSITAIRE EN  
SANTÉ MENTALE MENTAL HEALTH  
UNIVERSITY INSTITUTE

# What All Teens Should Know About Sleep!!

## What is unique about your sleep as a teen?

The biological clock becomes delayed during puberty

This means, you may actually feel tired at a later hour than you did as a child

Social things like phones and internet can also explain why you find it hard to get into bed at night

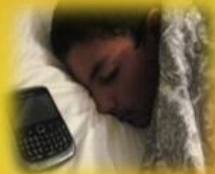

You should get around 9 hours of sleep each night (even on the weekends!)

*"Sleep is my weapon...I think what works best is sleep, water and a good cleanser."* - Jennifer Lopez

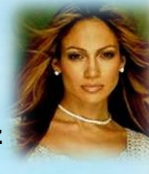

Even though you may not feel tired until very late, you actually need more sleep now than you did as a child because your brain and body are growing now more than ever before!

## Did you know that sleep is important for your...

### Emotions and Behaviour

Sleep deprivation is related to negative moods like depression and anxiety

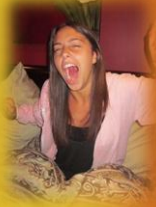

### Physical Health

Short sleep is linked with an increased risk for becoming overweight or obese

### Academic Success

Not enough sleep, bad sleep quality, and feeling tired are related to worse school performance

### Athletic Performance

The Stanford University men's varsity basketball team increased their sleep to 8.5 hours and their shooting accuracy went up by 9%!

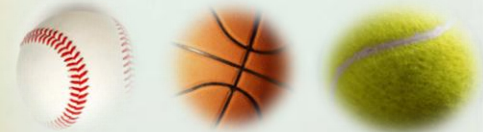

## What can you do to improve your sleep habits?

1. Don't eat a big meal before bedtime, but also don't go to sleep feeling hungry
2. Make sure your bedroom is comfortable for sleep (consider the temperature, noise, light, mattress etc.)

3. Avoid smoking or drinking caffeine in the evening
4. Make yourself a relaxing routine before bed
5. Exercise for 20-30 mins each day but not right before bed

6. Keep cell phones, computers, & TVs out of your bedroom!

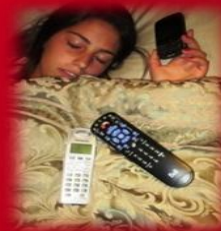

7. Expose yourself to bright lights in the morning

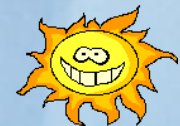

8. Wake up and go to sleep at the same time every day!



# Promoting Sleep Hygiene In Adolescents

## Tips to provide adolescents:

- Go to bed and wake up at the same time every day (even on the weekends!)
- Avoid caffeine consumption (coffee, soft drinks, chocolate) starting in the late afternoon
- Avoid drinking alcohol in the evening- it prevents your brain from getting into deep and REM sleep
- Avoid smoking cigarettes in the evening- it is a stimulant just like caffeine!
- Expose yourself to bright lights in the morning- sunlight helps the biological clock to reset itself each day
- Make sure your bedroom is conducive to sleep- consider noise, light, temperature, mattress, and pillow
- Try to exercise 20-30 minutes every day but at least 3 hours before going to bed
- Develop a relaxing routine before bed- ideas include bathing, music, and reading
- Don't go to bed feeling hungry, but also don't eat a heavy meal right before bed!
- Reserve your bed for sleeping only- keep cell phones, computers, televisions, out of your bedroom

## What is unique about adolescent sleep?

- Adolescents need more sleep than children due to the rapid physical, cognitive and emotional growth taking place during puberty (~ 9 hours is recommended)
- The adolescent biological clock is delayed such that there is a natural tendency to prefer later bedtimes and wake times than do children or adults
- During puberty, sleep becomes lighter (less stage 4 deep sleep) and therefore, there is a high vulnerability to disruption throughout the night
- Social factors like busy school schedules, media in the bedroom, less parental control over bedtime, and extracurricular activities all contribute to late bedtimes
